# Supplementary material for: Breastfeeding and the risk for diarrhea morbidity and mortality
Source: BMC Public Health. 2011 Apr 13;11(Suppl 3):S15. doi: 10.1186/1471-2458-11-S3-S15 (PMC3231888; doi:10.1186/1471-2458-11-S3-S15)
Supplement: Additional file 1 — Breastfeeding and Diarrhea The additional file 1 is an excel spreadsheet named Final_Web_Appendix. This file contains two sheets. The ‘Data Abstraction’ sheet includes all data abstracted from studies, as well as notes on methodology and limitations. The ‘Reverse Causality’ sheet includes the assessment sheet used to systematically score studies on reverse causation bias. [file 1471-2458-11-S3-S15-S1.xlsx]

## Sheet: Data Abstraction
STUDY IDENTIFIERS AND CONTEXT										STUDY DESIGN AND LIMITATIONS														INTERVENTION						OUTCOME EFFECTS								SUMMARY
											RCT (HIGH SCORE)			If cluster RCT		If follow up study (RCT cRCT or Cohort)	QUASI EXPERIMENTAL (MODERATE) OBSERVATIONAL (LOW)				Before/After Design
Study	Author	Year of Publication	Journal Reference	Years of study	Country	Location within Country	Urban, rural, mixed	Baseline Mortality Rate (IMR)	Setting	Study design randomised?	Allocation concealed? (adequate randomization)	Assessment blinded?	Intent to treat analysis?	Cluster RCT results adjusted for clustering?	If cluster RCT are there more than 12 units for analysis?	Minimal loss to follow up? (more than 20% is serious limitation)	Study Design	Quasi Experimental Design?	Adjustment for confounding?	Reverse causality?	Before/After Design?	In Cochrane?	Reason for exclusion from Cochrane?	Coverage of intervention	Intervention delivered through routine health system?	Other intervention at same time as study?	Age Group	Study Description	Comparison Groups (Comparison Group 1 vs. Comparison Group 2)	Outcome definition	Comparison Group 1 Numerator	Comparison Group 1 Denominator	Comparison Group 2 (Reference Group) Numerator	Comparison Group 2 (Reference Group) Denominator	Effect Measure	95% CI	P-value	Efficacy or Effectiveness?	Overall Study Limitations	Comments	Age Group(s) Applied to in Meta-Analysis
DIARRHEA INCIDENCE
Infant-feeding practices and their relationship with diarrheal and other diseases in Huascar (Lima) Peru	Brown	1989	Pediatrics 1989; 83(1): 31-40	Not stated	Peru	Pueblo Joven Huascar	Urban	-	Community	No	NA	NA	NA	NA	NA	0.02	Prospective cohort	Not Quasi-experimental	Age, socioeconomic status variables	Likely	NA			NA	NA	No	0-5 mos	Monthly questionnaires to assess BF status; diarrhea incidence assessed at thrice-weekly community-based surveillance	Predominantly BF vs. EBF	Diarrhea incidence - # episodes per 100 days of observation; (Diarrhea - liquid/ semi liquid stools passed during 24-hr periods; Diarrhea episode - all contiguous days with diarrhea not separated by at least 2-diarrhea free days)	128 episodes in predominantly BF group	5639 days of observation contributed by predominantly BF group	23 episodes in EBF group	1276 days of observation contributed by EBF group	RR: 1.26	0.81-1.95	-	N.A.		RR & 95% CI calculated in STATA using csi command	0-5 mos
Infant-feeding practices and their relationship with diarrheal and other diseases in Huascar (Lima) Peru	Brown	1989	Pediatrics 1989; 83(1): 31-40	Not stated	Peru	Pueblo Joven Huascar	Urban	-	Community	No	NA	NA	NA	NA	NA	0.02	Prospective cohort	Not Quasi-experimental	Age, socioeconomic status variables	Likely	NA			NA	NA	No	0-5 mos	Monthly questionnaires to assess BF status; diarrhea incidence assessed at thrice-weekly community-based surveillance	Partially BF vs. EBF	Diarrhea incidence - # episodes per 100 days of observation; (Diarrhea - liquid/ semi liquid stools passed during 24-hr periods; Diarrhea episode - all contiguous days with diarrhea not separated by at least 2-diarrhea free days)	429 episodes in partially BF group	16399 days of observation contributed by partially BF group	23 episodes in EBF group	1276 days of observation contributed by EBF group	RR: 1.45	0.96-2.20	-	N.A.		RR & 95% CI calculated in STATA using csi command	0-5 mos
Infant-feeding practices and their relationship with diarrheal and other diseases in Huascar (Lima) Peru	Brown	1989	Pediatrics 1989; 83(1): 31-40	Not stated	Peru	Pueblo Joven Huascar	Urban	-	Community	No	NA	NA	NA	NA	NA	0.02	Prospective cohort	Not Quasi-experimental	Age, socioeconomic status variables	Likely	NA			NA	NA	No	0-5 mos	Monthly questionnaires to assess BF status; diarrhea incidence assessed at thrice-weekly community-based surveillance	NOT BF vs. EBF	Diarrhea incidence - # episodes per 100 days of observation; (Diarrhea - liquid/ semi liquid stools passed during 24-hr periods; Diarrhea episode - all contiguous days with diarrhea not separated by at least 2-diarrhea free days)	53 episodes in NOT BF group	1138 days of observation contributed by NOT BF group	23 episodes in EBF group	1276 days of observation contributed by EBF group	RR: 2.58	1.59-4.19	-	N.A.		RR & 95% CI calculated in STATA using csi command	0-5 mos
Infant-feeding practices and their relationship with diarrheal and other diseases in Huascar (Lima) Peru	Brown	1989	Pediatrics 1989; 83(1): 31-40	Not stated	Peru	Pueblo Joven Huascar	Urban	-	Community	No	NA	NA	NA	NA	NA	0.02	Prospective cohort	Not Quasi-experimental	Age, socioeconomic status variables	Likely	NA			NA	NA	No	0-5 mos	Monthly questionnaires to assess BF status; diarrhea incidence assessed at thrice-weekly community-based surveillance	Partially BF vs. Predominantly BF	Diarrhea incidence - # episodes per 100 days of observation; (Diarrhea - liquid/ semi liquid stools passed during 24-hr periods; Diarrhea episode - all contiguous days with diarrhea not separated by at least 2-diarrhea free days)	429 episodes in partially BF group	16399 days of observation contributed by partially BF group	128 episodes in predominantly BF group	5639 days of observation contributed by predominantly BF group	RR: 1.15	0.95-1.40	-	N.A.		RR & 95% CI calculated in STATA using csi command	0-5 mos
Infant-feeding practices and their relationship with diarrheal and other diseases in Huascar (Lima) Peru	Brown	1989	Pediatrics 1989; 83(1): 31-40	Not stated	Peru	Pueblo Joven Huascar	Urban	-	Community	No	NA	NA	NA	NA	NA	0.02	Prospective cohort	Not Quasi-experimental	Age, socioeconomic status variables	Likely	NA			NA	NA	No	0-5 mos	Monthly questionnaires to assess BF status; diarrhea incidence assessed at thrice-weekly community-based surveillance	NOT BF vs. Predominantly BF	Diarrhea incidence - # episodes per 100 days of observation; (Diarrhea - liquid/ semi liquid stools passed during 24-hr periods; Diarrhea episode - all contiguous days with diarrhea not separated by at least 2-diarrhea free days)	53 episodes in NOT BF group	1138 days of observation contributed by NOT BF group	128 episodes in predominantly BF group	5639 days of observation contributed by predominantly BF group	RR: 2.05	1.50-2.81	-	N.A.		RR & 95% CI calculated in STATA using csi command	0-5 mos
Infant-feeding practices and their relationship with diarrheal and other diseases in Huascar (Lima) Peru	Brown	1989	Pediatrics 1989; 83(1): 31-40	Not stated	Peru	Pueblo Joven Huascar	Urban	-	Community	No	NA	NA	NA	NA	NA	0.02	Prospective cohort	Not Quasi-experimental	Age, socioeconomic status variables	Likely	NA			NA	NA	No	0-5 mos	Monthly questionnaires to assess BF status; diarrhea incidence assessed at thrice-weekly community-based surveillance	NOT BF vs. Partially BF	Diarrhea incidence - # episodes per 100 days of observation; (Diarrhea - liquid/ semi liquid stools passed during 24-hr periods; Diarrhea episode - all contiguous days with diarrhea not separated by at least 2-diarrhea free days)	53 episodes in NOT BF group	1138 days of observation contributed by NOT BF group	429 episodes in partially BF group	16399 days of observation contributed by partially BF group	RR: 1.78	1.35-2.35	-	N.A.		RR & 95% CI calculated in STATA using csi command	0-5 mos
Infant-feeding practices and their relationship with diarrheal and other diseases in Huascar (Lima) Peru	Brown	1989	Pediatrics 1989; 83(1): 31-40	Not stated	Peru	Pueblo Joven Huascar	Urban	-	Community	No	NA	NA	NA	NA	NA	0.02	Prospective cohort	Not Quasi-experimental	Age, socioeconomic status variables	Likely	NA			NA	NA	No	6-11 mos	Monthly questionnaires to assess BF status; diarrhea incidence assessed at thrice-weekly community-based surveillance	NOT BF vs. Partially BF	Diarrhea incidence - # episodes per 100 days of observation; (Diarrhea - liquid/ semi liquid stools passed during 24-hr periods; Diarrhea episode - all contiguous days with diarrhea not separated by at least 2-diarrhea free days)	86 episodes in NOT BF group	2424 days of observation contributed by NOT BF group	535 episodes in Partially BF	19604 days of observation contributed by partially BF	RR: 1.3	1.04-1.63	-	N.A.		RR & 95% CI calculated in STATA using csi command	6-11 mos
Early initation of breastfeeding and the risk of infant diarrhea in rural Egypt	Clemens	1999	Pediatrics 1999; 104(1): e3	1995-1997	Egypt	Abu-Homos	Rural	-	Community	No	NA	NA	NA	NA	NA	0.015	Prospective Cohort	Not Quasi-experimental	Time of initiation of breastfeeding (early vs late); gender; birth site (hospital or clinic vs home); age at follow-up (in days); maternal education (none vs some); season at follow-up (May–October, warm vs November–April, cold); presence of municipal water supply to house; presence of a sanitary latrine in house; ownership of a television; and ownership of a washing machine.	Likely	NA			NA	NA	No	0-5 mos	Followup visits twice weekly to collect feeding and diarrhea incidence data on 'ever-breastfed' infants (i.e. infants initially BF as reported at baseline)	Partially BF vs. EBF	Diarrhea incidence - # episodes/ # person-days at risk; (Diarrhea episode - 1) passage of three or more loose or liquid stools in any 24-hour period (for breastfed infants, also required a statement by mother that stools more frequent or less formed than usual); or 2) passage of at least one loose or liquid stool with visible blood in a 24-hour period; an episode bounded by three or more consecut…	183 episodes in Partially BF group	8502 days of observation observed in Partially BF group	353 episodes in EBF group	19943 days of observation in EBF group	RR: 1.22	1.02-1.45		N.A.		RR & 95% CI calculated in STATA using csi command	0-5 mos
Early initation of breastfeeding and the risk of infant diarrhea in rural Egypt	Clemens	1999	Pediatrics 1999; 104(1): e3	1995-1997	Egypt	Abu-Homos	Rural	-	Community	No	NA	NA	NA	NA	NA	0.015	Prospective Cohort	Not Quasi-experimental	Time of initiation of breastfeeding (early vs late); gender; birth site (hospital or clinic vs home); age at follow-up (in days); maternal education (none vs some); season at follow-up (May–October, warm vs November–April, cold); presence of municipal water supply to house; presence of a sanitary latrine in house; ownership of a television; and ownership of a washing machine.	Likely	NA			NA	NA	No	0-5 mos	Followup visits twice weekly to collect feeding and diarrhea incidence data on 'ever-breastfed' infants (i.e. infants initially BF as reported at baseline)	NOT BF vs. EBF	Diarrhea incidence - # episodes/ # person-days at risk; (Diarrhea episode - 1) passage of three or more loose or liquid stools in any 24-hour period (for breastfed infants, also required a statement by mother that stools more frequent or less formed than usual); or 2) passage of at least one loose or liquid stool with visible blood in a 24-hour period; an episode bounded by three or more consecut…	26 episodes in NOT BF group	752 days of observation observed in NOT BF group	353 episodes in EBF group	19943 days of observation in EBF group	RR: 1.95	1.32-2.89		N.A.		RR & 95% CI calculated in STATA using csi command	0-5 mos
Early initation of breastfeeding and the risk of infant diarrhea in rural Egypt	Clemens	1999	Pediatrics 1999; 104(1): e3	1995-1997	Egypt	Abu-Homos	Rural	-	Community	No	NA	NA	NA	NA	NA	0.015	Prospective Cohort	Not Quasi-experimental	Time of initiation of breastfeeding (early vs late); gender; birth site (hospital or clinic vs home); age at follow-up (in days); maternal education (none vs some); season at follow-up (May–October, warm vs November–April, cold); presence of municipal water supply to house; presence of a sanitary latrine in house; ownership of a television; and ownership of a washing machine.	Likely	NA			NA	NA	No	0-5 mos	Followup visits twice weekly to collect feeding and diarrhea incidence data on 'ever-breastfed' infants (i.e. infants initially BF as reported at baseline)	NOT BF vs. Partially BF	Diarrhea incidence - # episodes/ # person-days at risk; (Diarrhea episode - 1) passage of three or more loose or liquid stools in any 24-hour period (for breastfed infants, also required a statement by mother that stools more frequent or less formed than usual); or 2) passage of at least one loose or liquid stool with visible blood in a 24-hour period; an episode bounded by three or more consecut…	26 episodes in NOT BF group	752 days of observation observed in NOT BF group	183 episodes in Partially BF group	8502 days of observation observed in Partially BF group	RR: 1.61	1.07-2.41		N.A.		RR & 95% CI calculated in STATA using csi command	0-5 mos
Patterns of breastfeeding in Western Ethiopia and their relationsip to acute diarrhea in infants	Ketsela	1990	J Trop Pediatr 1990; 36: 180-3	1990	Ethiopia	Gamo-Gofa	Rural	-	Community	No	NA	NA	NA	NA	NA	NA	Cross-sectional	Not Quasi-experimental	No	Highly Likely	NA			NA	NA	No	0-6 mos	One-time community survey to assess BF status & diarrhea outcomes in 2 weeks prior to interview	Partially BF vs. Predominantly BF	Diarrhea incidence - not defined (Diarrhea - more frequent watery/loose stool than usual which started within 2 weeks of interview)	48 infants with diarrhea in partially BF group	114 infants partially BF	25 infants with diarrhea in Pred group	217 infants Pred BF	Adj RR: 5.20	3.0-9.1	<0.05	N.A.			0-5 mos
Breastfeeding lowers the frequency and duration of ARI and diarrhea in infants under 6 months of age	Lopez	1997	J Nutr. 1997; 127(3): 436-63	Not stated	Mexico	Mexico City, Iztapalapa	Urban	-	Community	No	NA	NA	NA	NA	NA	0.139	Prospective cohort	Not Quasi-experimental	Infant age (months), maternal age, maternal years of education, # individuals sleeping in same room (crowding), marital status, indicator of socioeconomic level of family (based on availability of tap water, sewage, paved floor, refrigerator), and presence of siblings	Highly Likely	NA			NA	NA	No	0-5 mos	Follow up visits every 2 weeks to assess BF status and diarrhea incidence	NOT BF vs. Partially BF	Diarrhea incidence - # episodes per 100 days of observation (Diarrhea - 3 or more liquid or semi solid stools per day; episodes separated by at least 2 days)	31 episodes in NOT BF group	6585 days of observation contributed by NOT BF group (6554 dia-free days)	18 episodes in Partially BF group	6180 days of observation contributed by Partially BF group (6162 dia-free days)	RR: 1.61	0.91-2.89	-	N.A.		RR & 95% CI calculated in STATA using csi command	0-5 mos
Breastfeeding lowers the frequency and duration of ARI and diarrhea in infants under 6 months of age	Lopez	1997	J Nutr. 1997; 127(3): 436-63	Not stated	Mexico	Mexico City, Iztapalapa	Urban	-	Community	No	NA	NA	NA	NA	NA	0.139	Prospective cohort	Not Quasi-experimental	Infant age (months), maternal age, maternal years of education, # individuals sleeping in same room (crowding), marital status, indicator of socioeconomic level of family (based on availability of tap water, sewage, paved floor, refrigerator), and presence of siblings	Likely	NA			NA	NA	No	6 mos	Follow up visits every 2 weeks to assess BF status and diarrhea incidence	NOT BF vs. Any BF	Diarrhea incidence - # episodes per 100 days of observation (Diarrhea - 3 or more liquid or semi solid stools per day; episodes separated by at least 2 days)	14 episodes in NOT BF group	2415 days of observation contributed by NOT BF group	9 episodes in Any BF group	2400 days of observation contributed by Any BF group	RR: 1.55	0.67-3.56	-	N.A.		RR & 95% CI calculated in STATA using csi command	6-11 mos
Breastfeeding lowers the frequency and duration of ARI and diarrhea in infants under 6 months of age	Lopez	1997	J Nutr. 1997; 127(3): 436-63	Not stated	Mexico	Mexico City, Iztapalapa	Urban	-	Community	No	NA	NA	NA	NA	NA	0.139	Prospective cohort	Not Quasi-experimental	Infant age (months), maternal age, maternal years of education, # individuals sleeping in same room (crowding), marital status, indicator of socioeconomic level of family (based on availability of tap water, sewage, paved floor, refrigerator), and presence of siblings	Highly Likely	NA			NA	NA	No	0-5 mos	Follow up visits every 2 weeks to assess BF status and diarrhea incidence	NOT BF vs. Predominantly BF (categorized as 'Fully BF' by author but recategorized for the conservative approach of this analysis)	Diarrhea incidence - # episodes per 100 days of observation (Diarrhea - 3 or more liquid or semi solid stools per day; episodes separated by at least 2 days)	31 episodes in NOT BF group	6585 days of observation contributed by NOT BF group	23 episodes in Fully Predominantly BF group	10530 days of observation in Fully Predominantly BF group	RR: 2.16	1.26-3.69	-	N.A.		RR & 95% CI calculated in STATA using csi command	0-5 mos
Breastfeeding lowers the frequency and duration of ARI and diarrhea in infants under 6 months of age	Lopez	1997	J Nutr. 1997; 127(3): 436-63	Not stated	Mexico	Mexico City, Iztapalapa	Urban	-	Community	No	NA	NA	NA	NA	NA	0.139	Prospective cohort	Not Quasi-experimental	Infant age (months), maternal age, maternal years of education, # individuals sleeping in same room (crowding), marital status, indicator of socioeconomic level of family (based on availability of tap water, sewage, paved floor, refrigerator), and presence of siblings	Highly Likely	NA			NA	NA	No	0-5 mos	Follow up visits every 2 weeks to assess BF status and diarrhea incidence	Partially BF vs. Predominantly BF (categorized as 'Fully BF' by author but recategorized for the conservative approach of this analysis)	Diarrhea incidence - # episodes per 100 days of observation (Diarrhea - 3 or more liquid or semi solid stools per day; episodes separated by at least 2 days)	18 episodes in Partially BF group	6180 days of observation contributed by Partially BF group	23 episodes in Fully Predominantly BF group	10530 days of observation in Fully Predominantly BF group	RR: 1.33	0.72-2.47	-	N.A.		RR & 95% CI calculated in STATA using csi command	0-5 mos
Breastfeeding lowers the frequency and duration of ARI and diarrhea in infants under 6 months of age	Lopez	1997	J Nutr. 1997; 127(3): 436-63	Not stated	Mexico	Mexico City, Iztapalapa	Urban	-	Community	No	NA	NA	NA	NA	NA	0.139	Prospective cohort	Not Quasi-experimental	Infant age (months), maternal age, maternal years of education, # individuals sleeping in same room (crowding), marital status, indicator of socioeconomic level of family (based on availability of tap water, sewage, paved floor, refrigerator), and presence of siblings	Highly Likely	NA			NA	NA	No	0-28 days	Follow up visits every 2 weeks to assess BF status and diarrhea incidence	Not BF vs. Partially BF	Diarrhea incidence - # episodes per 100 days of observation (Diarrhea - 3 or more liquid or semi solid stools per day; episodes separated by at least 2 days)	1 episode in NOT BF group	600 days of observation in NOT BF group	4 episodes in Partially BF group	990 days of observation in Partially BF group	RR: 0.41	0.05-3.68	-	N.A.		RR & 95% CI calculated in STATA using csi command	0-28 days (these episodes are also included in the 0-5 mos)
Breastfeeding lowers the frequency and duration of ARI and diarrhea in infants under 6 months of age	Lopez	1997	J Nutr. 1997; 127(3): 436-63	Not stated	Mexico	Mexico City, Iztapalapa	Urban	-	Community	No	NA	NA	NA	NA	NA	0.139	Prospective cohort	Not Quasi-experimental	Infant age (months), maternal age, maternal years of education, # individuals sleeping in same room (crowding), marital status, indicator of socioeconomic level of family (based on availability of tap water, sewage, paved floor, refrigerator), and presence of siblings	Highly Likely	NA			NA	NA	No	0-28 days	Follow up visits every 2 weeks to assess BF status and diarrhea incidence	Not BF vs. Predominantly BF (categorized as 'Fully BF' by author but recategorized for the conservative approach of this analysis)	Diarrhea incidence - # episodes per 100 days of observation (Diarrhea - 3 or more liquid or semi solid stools per day; episodes separated by at least 2 days)	1 episode in NOT BF group	600 days of observation in NOT BF group	8 episodes in Fully Predominantly BF group	3300 days of observation in Fully Predominantly BF group	RR: 0.69	0.09-5.49	-	N.A.		RR & 95% CI calculated in STATA using csi command	0-28 days (these episodes are also included in the 0-5 mos)
Breastfeeding lowers the frequency and duration of ARI and diarrhea in infants under 6 months of age	Lopez	1997	J Nutr. 1997; 127(3): 436-63	Not stated	Mexico	Mexico City, Iztapalapa	Urban	-	Community	No	NA	NA	NA	NA	NA	0.139	Prospective cohort	Not Quasi-experimental	Infant age (months), maternal age, maternal years of education, # individuals sleeping in same room (crowding), marital status, indicator of socioeconomic level of family (based on availability of tap water, sewage, paved floor, refrigerator), and presence of siblings	Highly Likely	NA			NA	NA	No	0-28 days	Follow up visits every 2 weeks to assess BF status and diarrhea incidence	Partially BF vs. Predominantly BF (categorized as 'Fully BF' by author but recategorized for the conservative approach of this analysis)	Diarrhea incidence - # episodes per 100 days of observation (Diarrhea - 3 or more liquid or semi solid stools per day; episodes separated by at least 2 days)	4 episodes in Partially BF group	990 days of observation in Partially BF group	8 episodes in Fully Predominantly BF group	3300 days of observation in Fully Predominantly BF group	RR: 1.67	0.50-5.52	-	N.A.		RR & 95% CI calculated in STATA using csi command	0-28 days (these episodes are also included in the 0-5 mos)
Lactancia materna y diarrea aguda en los primeros tres meses de vida	Macias-Carrillo	2005	Salud pública de méxico 2005; 47(1): 49-57	1994	Mexico	Durango City	Urban	-	Community	No	NA	NA	NA	NA	NA	0.125	Prospective Cohort	Not quasi experimental	Age, season of birth, sanitation/sewage system	Highly Likely	NA			NA	NA	No	0-3 mos	Home visits at 7 days and every two weeks thereafter to assess diarrhea illness and BF status	Partial BF vs. EBF	Diarrhea incidence - not defined (Diarrhea not defined)	not stated	not stated	not stated	not stated	Adj RR: 3.23	1.84-5.68	-	N.A.			0-5 mos
Lactancia materna y diarrea aguda en los primeros tres meses de vida	Macias-Carrillo	2005	Salud pública de méxico 2005; 47(1): 49-57	1994	Mexico	Durango City	Urban	-	Community	No	NA	NA	NA	NA	NA	0.125	Prospective Cohort	Not quasi experimental	Age, season of birth, sanitation/sewage system	Highly Likely	NA			NA	NA	No	0-3 mos	Home visits at 7 days and every two weeks thereafter to assess diarrhea illness and BF status	NOT BF vs. EBF	Diarrhea incidence - not defined (Diarrhea not defined)	not stated	not stated	not stated	not stated	Adj RR: 4.36	2.32-8.19	-	N.A.			0-5 mos
DIARRHEA PREVALENCE
Breastfeeding, nutritional state, and child survival in rural Bangladesh	Briend	1988	British Medical Journal; 296: 879-82	Not stated	Bangladesh	Matlab	Rural	-	Community	No	NA	NA	NA	NA	NA	not stated	Prospective cohort	Not Quasi-experimental	Age	Highly Likely	NA			NA	No	No	12-23 mos	Monthly visits to assess BF status & diarrhea illness	Not BF vs. Any BF	Diarrhea Prevalence - # child months of diarrhea per total # child months observed	1246 child mos with diarrhea symptoms in NOT BF group	7643 child months observed in NOT BF group	2501 child months with symptoms in Any BF group	20032 child months observed in Any BF group	RR: 1.31	1.23-1.39		N.A.		RR & 95% CI calculated in STATA using csi command	12-23 mos; 6-23 mos
Infant-feeding practices and their relationship with diarrheal and other diseases in Huascar (Lima) Peru	Brown	1989	Pediatrics 1989; 83(1): 31-40	Not stated	Peru	Pueblo Joven Huascar	Urban	-	Community	No	NA	NA	NA	NA	NA	0.02	Prospective cohort	Not Quasi-experimental	Age, socioeconomic variables	Likely	NA			NA	NA	No	0-5 mos	Monthly questionnaires to assess BF status; diarrhea prevalence assessed at thrice-weekly community-based surveillance	Predominantly BF vs. EBF	Diarrhea prevalence - # days ill per 100 days of observation; (Diarrhea - liquid/ semi liquid stools passed during 24-hr periods; Diarrhea episode - all contiguous days with diarrhea not separated by at least 2-diarrhea free days)	778 days ill with diarrhea reported for predominantly BF group	5639 days of observation contributed by predominantly BF group	90 days ill with diarrhea reported by EBF group	1276 days of observation contributed by EBF group	RR: 1.96	1.59-2.41	-	N.A.		RR & 95% CI calculated in STATA using csi command	0-5 mos
Infant-feeding practices and their relationship with diarrheal and other diseases in Huascar (Lima) Peru	Brown	1989	Pediatrics 1989; 83(1): 31-40	Not stated	Peru	Pueblo Joven Huascar	Urban	-	Community	No	NA	NA	NA	NA	NA	0.02	Prospective cohort	Not Quasi-experimental	Age, socioeconomic variables	Likely	NA			NA	NA	No	0-5 mos	Monthly questionnaires to assess BF status; diarrhea prevalence assessed at thrice-weekly community-based surveillance	Partially BF vs. EBF	Diarrhea prevalence - # days ill per 100 days of observation; (Diarrhea - liquid/ semi liquid stools passed during 24-hr periods; Diarrhea episode - all contiguous days with diarrhea not separated by at least 2-diarrhea free days)	2577 days ill with diarrhea reported for partially BF group	16399 days of observation contributed by partially BF group	90 days ill with diarrhea reported by EBF group	1276 days of observation contributed by EBF group	RR: 2.23	1.82-2.73	-	N.A.		RR & 95% CI calculated in STATA using csi command	0-5 mos
Infant-feeding practices and their relationship with diarrheal and other diseases in Huascar (Lima) Peru	Brown	1989	Pediatrics 1989; 83(1): 31-40	Not stated	Peru	Pueblo Joven Huascar	Urban	-	Community	No	NA	NA	NA	NA	NA	0.02	Prospective cohort	Not Quasi-experimental	Age, socioeconomic variables	Likely	NA			NA	NA	No	0-5 mos	Monthly questionnaires to assess BF status; diarrhea prevalence assessed at thrice-weekly community-based surveillance	NOT BF vs. EBF	Diarrhea prevalence - # days ill per 100 days of observation; (Diarrhea - liquid/ semi liquid stools passed during 24-hr periods; Diarrhea episode - all contiguous days with diarrhea not separated by at least 2-diarrhea free days)	314 days ill with diarrhea reported by NOT BF group	1138 days of observation contributed by NOT BF group	90 days ill with diarrhea reported by EBF group	1276 days of observation contributed by EBF group	RR: 3.91	3.14-4.88	-	N.A.		RR & 95% CI calculated in STATA using csi command	0-5 mos
Infant-feeding practices and their relationship with diarrheal and other diseases in Huascar (Lima) Peru	Brown	1989	Pediatrics 1989; 83(1): 31-40	Not stated	Peru	Pueblo Joven Huascar	Urban	-	Community	No	NA	NA	NA	NA	NA	0.02	Prospective cohort	Not Quasi-experimental	Age, socioeconomic variables	Likely	NA			NA	NA	No	0-5 mos	Monthly questionnaires to assess BF status; diarrhea prevalence assessed at thrice-weekly community-based surveillance	Partially BF vs. Predominantly BF	Diarrhea prevalence - # days ill per 100 days of observation; (Diarrhea - liquid/ semi liquid stools passed during 24-hr periods; Diarrhea episode - all contiguous days with diarrhea not separated by at least 2-diarrhea free days)	2577 days ill with diarrhea reported for partially BF group	16399 days of observation contributed by partially BF group	778 days ill with diarrhea reported for predominantly BF group	5639 days of observation contributed by predominantly BF group	RR: 1.14	1.06-1.23	-	N.A.		RR & 95% CI calculated in STATA using csi command	0-5 mos
Infant-feeding practices and their relationship with diarrheal and other diseases in Huascar (Lima) Peru	Brown	1989	Pediatrics 1989; 83(1): 31-40	Not stated	Peru	Pueblo Joven Huascar	Urban	-	Community	No	NA	NA	NA	NA	NA	0.02	Prospective cohort	Not Quasi-experimental	Age, socioeconomic variables	Likely	NA			NA	NA	No	0-5 mos	Monthly questionnaires to assess BF status; diarrhea prevalence assessed at thrice-weekly community-based surveillance	NOT BF vs Predominantly BF	Diarrhea prevalence - # days ill per 100 days of observation; (Diarrhea - liquid/ semi liquid stools passed during 24-hr periods; Diarrhea episode - all contiguous days with diarrhea not separated by at least 2-diarrhea free days)	314 days ill with diarrhea reported by NOT BF group	1138 days of observation contributed by NOT BF group	778 days ill with diarrhea reported for predominantly BF group	5639 days of observation contributed by predominantly BF group	RR: 2.00	1.78-2.24	-	N.A.		RR & 95% CI calculated in STATA using csi command	0-5 mos
Infant-feeding practices and their relationship with diarrheal and other diseases in Huascar (Lima) Peru	Brown	1989	Pediatrics 1989; 83(1): 31-40	Not stated	Peru	Pueblo Joven Huascar	Urban	-	Community	No	NA	NA	NA	NA	NA	0.02	Prospective cohort	Not Quasi-experimental	Age, socioeconomic variables	Likely	NA			NA	NA	No	0-5 mos	Monthly questionnaires to assess BF status; diarrhea prevalence assessed at thrice-weekly community-based surveillance	NOT BF vs. Partially BF	Diarrhea prevalence - # days ill per 100 days of observation; (Diarrhea - liquid/ semi liquid stools passed during 24-hr periods; Diarrhea episode - all contiguous days with diarrhea not separated by at least 2-diarrhea free days)	314 days ill with diarrhea reported by NOT BF group	1138 days of observation contributed by NOT BF group	2577 days ill with diarrhea reported for partially BF group	16399 days of observation contributed by partially BF group	RR: 1.76	1.59-1.94	-	N.A.		RR & 95% CI calculated in STATA using csi command	0-5 mos
Infant-feeding practices and their relationship with diarrheal and other diseases in Huascar (Lima) Peru	Brown	1989	Pediatrics 1989; 83(1): 31-40	Not stated	Peru	Pueblo Joven Huascar	Urban	-	Community	No	NA	NA	NA	NA	NA	0.02	Prospective cohort	Not Quasi-experimental	Age, socioeconomic variables	Likely	NA			NA	NA	No	6-11 mos	Monthly questionnaires to assess BF status; diarrhea prevalence assessed at thrice-weekly community-based surveillance	NOT BF vs Partially BF	Diarrhea prevalence - # days ill per 100 days of observation; (Diarrhea - liquid/ semi liquid stools passed during 24-hr periods; Diarrhea episode - all contiguous days with diarrhea not separated by at least 2-diarrhea free days)	572 days ill with diarrhea reported by NOT BF group	2424 days of observation contributed by NOT BF group	2878 days ill with diarrhea reported by Partially BF group	19604 days of observation contributed by partially BF group	RR: 1.61	1.49-1.74	-	N.A.		RR & 95% CI calculated in STATA using csi command	6-11 mos; 6-23 mos
Breastfeeding lowers the frequency and duration of ARI and diarrhea in infants under 6 months of age	Lopez	1997	J Nutr. 1997; 127(3): 436-63	Not stated	Mexico	Mexico City, Iztapalapa	Urban	-	Community	No	NA	NA	NA	NA	NA	0.139	Prospective cohort	Not Quasi-experimental	Infant age (mos), maternal age, maternal yrs of education, # individuals sleeping in same room (crowding), marital status, indicator of socioeconomic level of family (based on availability of tap water, sewage, paved floor, refrigerator), and presence of siblings	Highly Likely	NA			NA	NA	No	0-5 mos	Follow up visits every 2 weeks to assess BF status and diarrhea prevalence	Not BF vs. Partially BF	Diarrhea prevalence - # days ill per 100 days of observation (Diarrhea - 3 or more liquid or semi solid stools per day; episodes separated by at least 2 days)	223 days ill with diarrhea in NOT BF group	6585 days of observation contributed by NOT BF group	84 days ill with diarrhea in Partially BF group	6180 days of observation contributed by partially BF group	RR: 2.49	1.94-3.19	-	N.A.		RR & 95% CI calculated in STATA using csi command	0-5 mos
Breastfeeding lowers the frequency and duration of ARI and diarrhea in infants under 6 months of age	Lopez	1997	J Nutr. 1997; 127(3): 436-63	Not stated	Mexico	Mexico City, Iztapalapa	Urban	-	Community	No	NA	NA	NA	NA	NA	0.139	Prospective cohort	Not Quasi-experimental	Infant age (mos), maternal age, maternal yrs of education, # individuals sleeping in same room (crowding), marital status, indicator of socioeconomic level of family (based on availability of tap water, sewage, paved floor, refrigerator), and presence of siblings	Likely	NA			NA	NA	No	6 mos	Follow up visits every 2 weeks to assess BF status and diarrhea prevalence	Not BF vs. Any BF	Diarrhea prevalence - # days ill per 100 days of observation (Diarrhea - 3 or more liquid or semi solid stools per day; episodes separated by at least 2 days)	72 days ill with diarrhea in NOT BF group	2415 days of observation contributed by NOT BF group	50 days ill with diarrhea in Any BF group	2400 days of observation contributed by Any BF group	RR: 1.43	1.00-2.04	-	N.A.		RR & 95% CI calculated in STATA using csi command	6-11 mos; 6-23 mos
Breastfeeding lowers the frequency and duration of ARI and diarrhea in infants under 6 months of age	Lopez	1997	J Nutr. 1997; 127(3): 436-63	Not stated	Mexico	Mexico City, Iztapalapa	Urban	-	Community	No	NA	NA	NA	NA	NA	0.139	Prospective cohort	Not Quasi-experimental	Infant age (mos), maternal age, maternal yrs of education, # individuals sleeping in same room (crowding), marital status, indicator of socioeconomic level of family (based on availability of tap water, sewage, paved floor, refrigerator), and presence of siblings	Highly Likely	NA			NA	NA	No	0-5 mos	Follow up visits every 2 weeks to assess BF status and diarrhea prevalence	Not BF vs. Predominantly BF (categorized as 'Fully BF' by author but recategorized for the conservative approach of this analysis)	Diarrhea prevalence - # days ill per 100 days of observation (Diarrhea - 3 or more liquid or semi solid stools per day; episodes separated by at least 2 days)	223 days ill with diarrhea in NOT BF group	6585 days of observation contributed by NOT BF group	82 days ill with diarrhea in Fully Predominantly BF group	10530 days of observation contributed by Fully Predominantly BF group	RR: 4.35	3.38-5.59	-	N.A.		RR & 95% CI calculated in STATA using csi command	0-5 mos
Breastfeeding lowers the frequency and duration of ARI and diarrhea in infants under 6 months of age	Lopez	1997	J Nutr. 1997; 127(3): 436-63	Not stated	Mexico	Mexico City, Iztapalapa	Urban	-	Community	No	NA	NA	NA	NA	NA	0.139	Prospective cohort	Not Quasi-experimental	Infant age (mos), maternal age, maternal yrs of education, # individuals sleeping in same room (crowding), marital status, indicator of socioeconomic level of family (based on availability of tap water, sewage, paved floor, refrigerator), and presence of siblings	Highly Likely	NA			NA	NA	No	0-5 mos	Follow up visits every 2 weeks to assess BF status and diarrhea prevalence	Partially BF vs. Predominantly BF (categorized as 'Fully BF' by author but recategorized for the conservative approach of this analysis)	Diarrhea prevalence - # days ill per 100 days of observation (Diarrhea - 3 or more liquid or semi solid stools per day; episodes separated by at least 2 days)	84 days ill with diarrhea in Partially BF group	6180 days of observation contributed by partially BF group	82 days ill with diarrhea in Fully Predominantly BF group	10530 days of observation contributed by Fully Predominantly BF group	RR: 1.75	1.29-2.36	-	N.A.		RR & 95% CI calculated in STATA using csi command	0-5 mos
Breastfeeding lowers the frequency and duration of ARI and diarrhea in infants under 6 months of age	Lopez	1997	J Nutr. 1997; 127(3): 436-63	Not stated	Mexico	Mexico City, Iztapalapa	Urban	-	Community	No	NA	NA	NA	NA	NA	0.139	Prospective cohort	Not Quasi-experimental	Infant age (mos), maternal age, maternal yrs of education, # individuals sleeping in same room (crowding), marital status, indicator of socioeconomic level of family (based on availability of tap water, sewage, paved floor, refrigerator), and presence of siblings	Highly Likely	NA			NA	NA	No	0-28 days	Follow up visits every 2 weeks to assess BF status and diarrhea prevalence	Not BF vs. Partially BF	Diarrhea prevalence - # days ill per 100 days of observation (Diarrhea - 3 or more liquid or semi solid stools per day; episodes separated by at least 2 days)	6 days ill in NOT BF group	600 days of observation in NOT BF group	24 days ill in Partially BF group	990 days of observation in Partially BF group	RR: 0.41	0.17-1.00	-	N.A.		RR & 95% CI calculated in STATA using csi command	0-28 days (these episodes are also included in the 0-5 mos)
Breastfeeding lowers the frequency and duration of ARI and diarrhea in infants under 6 months of age	Lopez	1997	J Nutr. 1997; 127(3): 436-63	Not stated	Mexico	Mexico City, Iztapalapa	Urban	-	Community	No	NA	NA	NA	NA	NA	0.139	Prospective cohort	Not Quasi-experimental	Infant age (mos), maternal age, maternal yrs of education, # individuals sleeping in same room (crowding), marital status, indicator of socioeconomic level of family (based on availability of tap water, sewage, paved floor, refrigerator), and presence of siblings	Highly Likely	NA			NA	NA	No	0-28 days	Follow up visits every 2 weeks to assess BF status and diarrhea prevalence	Not BF vs. Predominantly BF (categorized as 'Fully BF' by author but recategorized for the conservative approach of this analysis)	Diarrhea prevalence - # days ill per 100 days of observation (Diarrhea - 3 or more liquid or semi solid stools per day; episodes separated by at least 2 days)	6 days ill in NOT BF group	600 days of observation in NOT BF group	18 days ill in Fully Predominantly BF group	3300 days of observation in Fully Predominantly BF group	RR: 1.83	0.73-4.60	-	N.A.		RR & 95% CI calculated in STATA using csi command	0-28 days (these episodes are also included in the 0-5 mos)
Breastfeeding lowers the frequency and duration of ARI and diarrhea in infants under 6 months of age	Lopez	1997	J Nutr. 1997; 127(3): 436-63	Not stated	Mexico	Mexico City, Iztapalapa	Urban	-	Community	No	NA	NA	NA	NA	NA	0.139	Prospective cohort	Not Quasi-experimental	Infant age (mos), maternal age, maternal yrs of education, # individuals sleeping in same room (crowding), marital status, indicator of socioeconomic level of family (based on availability of tap water, sewage, paved floor, refrigerator), and presence of siblings	Highly Likely	NA			NA	NA	No	0-28 days	Follow up visits every 2 weeks to assess BF status and diarrhea prevalence	Partially BF vs. Predominantly BF (categorized as 'Fully BF' by author but recategorized for the conservative approach of this analysis)	Diarrhea prevalence - # days ill per 100 days of observation (Diarrhea - 3 or more liquid or semi solid stools per day; episodes separated by at least 2 days)	24 days ill in Partially BF group	990 days of observation in Partially BF group	18 days ill in Fully Predominantly BF group	3300 days of observation in Fully Predominantly BF group	RR: 4.44	2.42-8.16	-	N.A.		RR & 95% CI calculated in STATA using csi command	0-28 days (these episodes are also included in the 0-5 mos)
Association between infants feeding pattern and diarrheal and respiratory infections: a cohort study in Chittagong, Bangladesh	Mihrshahi	2008	International Breastfeeding Journal 2008; 3:28	1999-2001	Bangladesh	Chittagong, Anowara thana	Rural	-	Community	No	NA	NA	NA	NA	NA	0.023	Cross-sectional	Not Quasi-experimental	Mother's education, asset score, husband living at home as a measure of socioeconomic status, type of latrine as a measure of sanitation, gender and other siblings	Likely	NA			NA	NA	No	0-5 mos	Monthly visits to assess feeding practices and 7-day diarrhea prevalence in week prior to survey	Predominantly BF vs. EBF	Point Prevalence - # reporting diarrhea in last 7 days per total # infants (Diarrhea -3 loose stools in 24 hrs in the past 7 days)	1 infant reporting diarrhea in Predominantly BF group	27 infants in predominantly BF group	11 infants reporting diarrhea in EBF group	167 infants in EBF group	Adjusted OR: 0.48 RR: 0.56	0.06-3.95 0.08-4.18	0.05 -	N.A.	# NOT BF too small for comparison	Numerators calculated using prevalence and denominators provided by paper; RR & 95% CI calculated in STATA using csi command	0-5 mos
Association between infants feeding pattern and diarrheal and respiratory infections: a cohort study in Chittagong, Bangladesh	Mihrshahi	2008	International Breastfeeding Journal 2008; 3:28	1999-2001	Bangladesh	Chittagong, Anowara thana	Rural	-	Community	No	NA	NA	NA	NA	NA	0.023	Cross-sectional	Not Quasi-experimental	Mother's education, asset score, husband living at home as a measure of socioeconomic status, type of latrine as a measure of sanitation, gender and other siblings	Likely	NA			NA	NA	No	0-5 mos	Monthly visits to assess feeding practices and 7-day diarrhea prevalence in week prior to survey	Partially BF vs. EBF	Point Prevalence - # reporting diarrhea in last 7 days per total # infants (Diarrhea -3 loose stools in 24 hrs in the past 7 days)	15 infants reporting diarrhea in partially BF group	78 infants in partially BF group	11 infants reporting diarrhea in EBF group	167 infants in EBF group	Adjusted OR: 3.43 RR: 2.92	1.47-8.03 1.41-6.06	<0.01 -	N.A.	# NOT BF too small for comparison	Numerators calculated using prevalence and denominators provided by paper; RR & 95% CI calculated in STATA using csi command	0-5 mos
Association between infants feeding pattern and diarrheal and respiratory infections: a cohort study in Chittagong, Bangladesh	Mihrshahi	2008	International Breastfeeding Journal 2008; 3:28	1999-2001	Bangladesh	Chittagong, Anowara thana	Rural	-	Community	No	NA	NA	NA	NA	NA	0.023	Cross-sectional	Not Quasi-experimental	Mother's education, asset score, husband living at home as a measure of socioeconomic status, type of latrine as a measure of sanitation, gender and other siblings	Likely	NA			NA	NA	No	0-5 mos	Monthly visits to assess feeding practices and 7-day diarrhea prevalence in week prior to survey	Partially BF vs. Predominantly BF	Point Prevalence - # reporting diarrhea in last 7 days per total # infants (Diarrhea -3 loose stools in 24 hrs in the past 7 days)	15 infants reporting diarrhea in partially BF group	78 infants in partially BF group	1 infant reporting diarrhea in Predominantly BF group	27 infants in predominantly BF group	RR: 5.19	0.72-37.47		N.A.	# NOT BF too small for comparison	Numerators calculated using prevalence and denominators provided by paper; RR & 95% CI calculated in STATA using csi command	0-5 mos
Prolonged breastfeeding in Bangladesh: indicators of inadequate feeding practices or mothers' response to children's poor health?	Mulder-Sibanda	1999	Public Health 1999; 113: 65-8	1990-1991	Bangladesh	-	Mixed	-	Community	No	NA	NA	NA	NA	NA	not stated	Cross-sectional	Not Quasi-experimental	Age	Likely	NA			NA	NA	Vitamin A	6-11 mos	Home visits to assess BF status and presence of diarrhea in preceding 24 hours	NOT BF vs. Partially BF	Prevalence - # reporting diarrhea in last 24 hrs per total # infants (Diarrhea = 3 or more loose motions in past 24 hrs)	45 infants reporting diarrhea in NOT BF group	87 infants in NOT BF group	42 infants reporting diarrhea in Partially BF group	653 infants in Partially BF group	RR: 8.04	5.63-11.48		N.A.		Numerators calculated using prevalence and denominators provided by paper; RR & 95% CI calculated in STATA using csi command	6-11 mos; 6-23 mos
Prolonged breastfeeding in Bangladesh: indicators of inadequate feeding practices or mothers' response to children's poor health?	Mulder-Sibanda	1999	Public Health 1999; 113: 65-8	1990-1991	Bangladesh	-	Mixed	-	Community	No	NA	NA	NA	NA	NA	not stated	Cross-sectional	Not Quasi-experimental	Age	Likely	NA			NA	NA	Vitamin A	12-23 mos	Home visits to assess BF status and presence of diarrhea in preceding 24 hours	NOT BF vs. Partially BF	Prevalence - # reporting diarrhea in last 24 hrs per total # infants (Diarrhea = 3 or more loose motions in past 24 hrs)	15 infants reporting diarrhea in NOT BF group	165 infants in NOT BF group	38 infants reporting diarrhea in Partially BF group	781 infants in Partially BF group	RR: 1.87	1.05-3.32		N.A.		Numerators calculated using prevalence and denominators provided by paper; RR & 95% CI calculated in STATA using csi command	12-23 mos; 6-23 mos
Breastfeeding and diarrheal morbidity	Popkin	1990	Pediatrics 1990; 86(6): 874-82	1983-1985	Philippines	Cebu, Mandaue, and Lapu	Rural	-	Community	No	NA	NA	NA	NA	NA	0.074	Prospective cohort	Not Quasi-experimental	Status at birth (gestational age & birth weight), weight velocity & weight velocity interacted with weight, infant sex, measures of personal hygiene (use of soap), water quality, excreta disposal practices, food hygiene, mother's concern with preventive measures(use of preventive health care), seasonality (measure of rainfall in 14 days before survey), crowding in community or household, presence…	Highly Likely	NA			NA	NA	No	0-2 mos (RURAL)	Household surveys to assess BF status & diarrhea outcomes in 7-days prior to survey	Predominantly BF vs. EBF	Diarrhea prevalence - percentage of infants with one or more diarrheal episodes in the 7 days prior to the survey; (Diarrhea not defined)	not provided	121 infants Predominantly BF infants	not provided	372 infants EBF	RR: 3.17	2.5-3.83	-	N.A.	Recall bias associated with interviews	Fixed Effects MA used to combine RRs for overall 0-5 mos age category for a given study site: RR: 2.65 (2.37-2.96) This RR was used in the overall random effects MA in lieu of RRs for individual age groups	0-5 mos
Breastfeeding and diarrheal morbidity	Popkin	1990	Pediatrics 1990; 86(6): 874-82	1983-1985	Philippines	Cebu, Mandaue, and Lapu	Rural	-	Community	No	NA	NA	NA	NA	NA	0.074	Prospective cohort	Not Quasi-experimental	Status at birth (gestational age & birth weight), weight velocity & weight velocity interacted with weight, infant sex, measures of personal hygiene (use of soap), water quality, excreta disposal practices, food hygiene, mother's concern with preventive measures(use of preventive health care), seasonality (measure of rainfall in 14 days before survey), crowding in community or household, presence…	Highly Likely	NA			NA	NA	No	>2-4 mos (RURAL)	Household surveys to assess BF status & diarrhea outcomes in 7-days prior to survey	Predominantly BF vs. EBF	Diarrhea prevalence - percentage of infants with one or more diarrheal episodes in the 7 days prior to the survey; (Diarrhea not defined)	not provided	133 infants Predominantly BF	not provided	218 infants EBF	RR: 2.12	1.77-2.46	-	N.A.	Recall bias associated with interviews
Breastfeeding and diarrheal morbidity	Popkin	1990	Pediatrics 1990; 86(6): 874-82	1983-1985	Philippines	Cebu, Mandaue, and Lapu	Rural	-	Community	No	NA	NA	NA	NA	NA	0.074	Prospective cohort	Not Quasi-experimental	Status at birth (gestational age & birth weight), weight velocity & weight velocity interacted with weight, infant sex, measures of personal hygiene (use of soap), water quality, excreta disposal practices, food hygiene, mother's concern with preventive measures(use of preventive health care), seasonality (measure of rainfall in 14 days before survey), crowding in community or household, presence…	Highly Likely	NA			NA	NA	No	>4-6 mos (RURAL)	Household surveys to assess BF status & diarrhea outcomes in 7-days prior to survey	Predominantly BF vs. EBF	Diarrhea prevalence - percentage of infants with one or more diarrheal episodes in the 7 days prior to the survey; (Diarrhea not defined)	not provided	42 infants Predominantly BF	not provided	31 infants EBF	RR: 3.18	2.53-3.84	-	N.A.	Recall bias associated with interviews
Breastfeeding and diarrheal morbidity	Popkin	1990	Pediatrics 1990; 86(6): 874-82	1983-1985	Philippines	Cebu, Mandaue, and Lapu	Urban	-	Community	No	NA	NA	NA	NA	NA	0.074	Prospective cohort	Not Quasi-experimental	Status at birth (gestational age & birth weight), weight velocity & weight velocity interacted with weight, infant sex, measures of personal hygiene (use of soap), water quality, excreta disposal practices, food hygiene, mother's concern with preventive measures(use of preventive health care), seasonality (measure of rainfall in 14 days before survey), crowding in community or household, presence…	Highly Likely	NA			NA	NA	No	0-2 mos (URBAN)	Household surveys to assess BF status & diarrhea outcomes in 7-days prior to survey	Predominantly BF vs. EBF	Diarrhea prevalence - percentage of infants with one or more diarrheal episodes in the 7 days prior to the survey; (Diarrhea not defined)	not provided	424 infants Predominantly BF	not provided	524 infants EBF	RR: 2.24	2.01-2.47	-	N.A.	Recall bias associated with interviews	Fixed Effects MA used to combine RRs for overall 0-5 mos age category for a given study site: RR: 2.14 (2.05-2.24) This RR was used in the overall random effects MA in lieu of RRs for individual age groups	0-5 mos
Breastfeeding and diarrheal morbidity	Popkin	1990	Pediatrics 1990; 86(6): 874-82	1983-1985	Philippines	Cebu, Mandaue, and Lapu	Urban	-	Community	No	NA	NA	NA	NA	NA	0.074	Prospective cohort	Not Quasi-experimental	Status at birth (gestational age & birth weight), weight velocity & weight velocity interacted with weight, infant sex, measures of personal hygiene (use of soap), water quality, excreta disposal practices, food hygiene, mother's concern with preventive measures(use of preventive health care), seasonality (measure of rainfall in 14 days before survey), crowding in community or household, presence…	Highly Likely	NA			NA	NA	No	>2-4 mos (URBAN)	Household surveys to assess BF status & diarrhea outcomes in 7-days prior to survey	Predominantly BF vs. EBF	Diarrhea prevalence - percentage of infants with one or more diarrheal episodes in the 7 days prior to the survey; (Diarrhea not defined)	not provided	400 infants Predominantly BF	not provided	345 infants EBF	RR: 1.97	1.80-2.13	-	N.A.	Recall bias associated with interviews
Breastfeeding and diarrheal morbidity	Popkin	1990	Pediatrics 1990; 86(6): 874-82	1983-1985	Philippines	Cebu, Mandaue, and Lapu	Urban	-	Community	No	NA	NA	NA	NA	NA	0.074	Prospective cohort	Not Quasi-experimental	Status at birth (gestational age & birth weight), weight velocity & weight velocity interacted with weight, infant sex, measures of personal hygiene (use of soap), water quality, excreta disposal practices, food hygiene, mother's concern with preventive measures(use of preventive health care), seasonality (measure of rainfall in 14 days before survey), crowding in community or household, presence…	Highly Likely	NA			NA	NA	No	>4-6 mos (URBAN)	Household surveys to assess BF status & diarrhea outcomes in 7-days prior to survey	Predominantly BF vs. EBF	Diarrhea prevalence - percentage of infants with one or more diarrheal episodes in the 7 days prior to the survey; (Diarrhea not defined)	not provided	96 infants Predominantly BF	not provided	58 infants EBF	RR: 2.21	2.07-2.35	-	N.A.	Recall bias associated with interviews
Breastfeeding and diarrheal morbidity	Popkin	1990	Pediatrics 1990; 86(6): 874-82	1983-1985	Philippines	Cebu, Mandaue, and Lapu	Rural	-	Community	No	NA	NA	NA	NA	NA	0.074	Prospective cohort	Not Quasi-experimental	Status at birth (gestational age & birth weight), weight velocity & weight velocity interacted with weight, infant sex, measures of personal hygiene (use of soap), water quality, excreta disposal practices, food hygiene, mother's concern with preventive measures(use of preventive health care), seasonality (measure of rainfall in 14 days before survey), crowding in community or household, presence…	Highly Likely	NA			NA	NA	No	0-2 mos (RURAL)	Household surveys to assess BF status & diarrhea outcomes in 7-days prior to survey	Partially BF vs. EBF	Diarrhea prevalence - percentage of infants with one or more diarrheal episodes in the 7 days prior to the survey; (Diarrhea not defined)	not provided	161 infants Partially BF	not provided	372 infants EBF	RR: 13.3	6.15-20.44	-	N.A.	Recall bias associated with interviews	Fixed Effects MA used to combine RRs for overall 0-5 mos age category for a given study site: RR: 12.29 (8.64-17.48) This RR was used in the overall random effects MA in lieu of RRs for individual age groups	0-5 mos
Breastfeeding and diarrheal morbidity	Popkin	1990	Pediatrics 1990; 86(6): 874-82	1983-1985	Philippines	Cebu, Mandaue, and Lapu	Rural	-	Community	No	NA	NA	NA	NA	NA	0.074	Prospective cohort	Not Quasi-experimental	Status at birth (gestational age & birth weight), weight velocity & weight velocity interacted with weight, infant sex, measures of personal hygiene (use of soap), water quality, excreta disposal practices, food hygiene, mother's concern with preventive measures(use of preventive health care), seasonality (measure of rainfall in 14 days before survey), crowding in community or household, presence…	Highly Likely	NA			NA	NA	No	>2-4 mos (RURAL)	Household surveys to assess BF status & diarrhea outcomes in 7-days prior to survey	Partially BF vs. EBF	Diarrhea prevalence - percentage of infants with one or more diarrheal episodes in the 7 days prior to the survey; (Diarrhea not defined)	not provided	278 infants Partially BF	not provided	218 infants EBF	RR: 12.93	6.04-19.81	-	N.A.	Recall bias associated with interviews
Breastfeeding and diarrheal morbidity	Popkin	1990	Pediatrics 1990; 86(6): 874-82	1983-1985	Philippines	Cebu, Mandaue, and Lapu	Rural	-	Community	No	NA	NA	NA	NA	NA	0.074	Prospective cohort	Not Quasi-experimental	Status at birth (gestational age & birth weight), weight velocity & weight velocity interacted with weight, infant sex, measures of personal hygiene (use of soap), water quality, excreta disposal practices, food hygiene, mother's concern with preventive measures(use of preventive health care), seasonality (measure of rainfall in 14 days before survey), crowding in community or household, presence…	Highly Likely	NA			NA	NA	No	>4-6 mos (RURAL)	Household surveys to assess BF status & diarrhea outcomes in 7-days prior to survey	Partially BF vs. EBF	Diarrhea prevalence - percentage of infants with one or more diarrheal episodes in the 7 days prior to the survey; (Diarrhea not defined)	not provided	529 infants Partially BF	not provided	31 infants EBF	RR: 10.61	4.63-16.60	-	N.A.	Recall bias associated with interviews
Breastfeeding and diarrheal morbidity	Popkin	1990	Pediatrics 1990; 86(6): 874-82	1983-1985	Philippines	Cebu, Mandaue, and Lapu	Urban	-	Community	No	NA	NA	NA	NA	NA	0.074	Prospective cohort	Not Quasi-experimental	Status at birth (gestational age & birth weight), weight velocity & weight velocity interacted with weight, infant sex, measures of personal hygiene (use of soap), water quality, excreta disposal practices, food hygiene, mother's concern with preventive measures(use of preventive health care), seasonality (measure of rainfall in 14 days before survey), crowding in community or household, presence…	Highly Likely	NA			NA	NA	No	0-2 mos (URBAN)	Household surveys to assess BF status & diarrhea outcomes in 7-days prior to survey	Partially BF vs. EBF	Diarrhea prevalence - percentage of infants with one or more diarrheal episodes in the 7 days prior to the survey; (Diarrhea not defined)	not provided	830 infants Partially BF	not provided	524 infants EBF	RR: 5.67	4.31-7.03	-	N.A.	Recall bias associated with interviews	Fixed Effects MA used to combine RRs for overall 0-5 mos age category for a given study site: RR: 5.35 (4.76-6.01) This RR was used in the overall random effects MA in lieu of RRs for individual age groups	0-5 mos
Breastfeeding and diarrheal morbidity	Popkin	1990	Pediatrics 1990; 86(6): 874-82	1983-1985	Philippines	Cebu, Mandaue, and Lapu	Urban	-	Community	No	NA	NA	NA	NA	NA	0.074	Prospective cohort	Not Quasi-experimental	Status at birth (gestational age & birth weight), weight velocity & weight velocity interacted with weight, infant sex, measures of personal hygiene (use of soap), water quality, excreta disposal practices, food hygiene, mother's concern with preventive measures(use of preventive health care), seasonality (measure of rainfall in 14 days before survey), crowding in community or household, presence…	Highly Likely	NA			NA	NA	No	>2-4 mos (URBAN)	Household surveys to assess BF status & diarrhea outcomes in 7-days prior to survey	Partially BF vs. EBF	Diarrhea prevalence - percentage of infants with one or more diarrheal episodes in the 7 days prior to the survey; (Diarrhea not defined)	not provided	860 infants Partially BF	not provided	345 infants EBF	RR: 6.30	4.93-7.66	-	N.A.	Recall bias associated with interviews
Breastfeeding and diarrheal morbidity	Popkin	1990	Pediatrics 1990; 86(6): 874-82	1983-1985	Philippines	Cebu, Mandaue, and Lapu	Urban	-	Community	No	NA	NA	NA	NA	NA	0.074	Prospective cohort	Not Quasi-experimental	Status at birth (gestational age & birth weight), weight velocity & weight velocity interacted with weight, infant sex, measures of personal hygiene (use of soap), water quality, excreta disposal practices, food hygiene, mother's concern with preventive measures(use of preventive health care), seasonality (measure of rainfall in 14 days before survey), crowding in community or household, presence…	Highly Likely	NA			NA	NA	No	>4-6 mos (URBAN)	Household surveys to assess BF status & diarrhea outcomes in 7-days prior to survey	Partially BF vs. EBF	Diarrhea prevalence - percentage of infants with one or more diarrheal episodes in the 7 days prior to the survey; (Diarrhea not defined)	not provided	1311 infants Partially BF	not provided	58 infants EBF	RR: 4.73	3.95-5.52	-	N.A.	Recall bias associated with interviews
Breastfeeding and diarrheal morbidity	Popkin	1990	Pediatrics 1990; 86(6): 874-82	1983-1985	Philippines	Cebu, Mandaue, and Lapu	Rural	-	Community	No	NA	NA	NA	NA	NA	0.074	Prospective cohort	Not Quasi-experimental	Status at birth (gestational age & birth weight), weight velocity & weight velocity interacted with weight, infant sex, measures of personal hygiene (use of soap), water quality, excreta disposal practices, food hygiene, mother's concern with preventive measures(use of preventive health care), seasonality (measure of rainfall in 14 days before survey), crowding in community or household, presence…	Highly Likely	NA			NA	NA	No	0-2 mos (RURAL)	Household surveys to assess BF status & diarrhea outcomes in 7-days prior to survey	NOT BF vs. EBF	Diarrhea prevalence - percentage of infants with one or more diarrheal episodes in the 7 days prior to the survey; (Diarrhea not defined)	not provided	44 infants NOT BF	not provided	372 infants EBF	RR: 17.32	6.74-27.89	-	N.A.	Recall bias associated with interviews	Fixed Effects MA used to combine RRs for overall 0-5 mos age category for a given study site: RR: 14.63 (9.90-21.63) This RR was used in the overall random effects MA in lieu of RRs for individual age groups	0-5 mos
Breastfeeding and diarrheal morbidity	Popkin	1990	Pediatrics 1990; 86(6): 874-82	1983-1985	Philippines	Cebu, Mandaue, and Lapu	Rural	-	Community	No	NA	NA	NA	NA	NA	0.074	Prospective cohort	Not Quasi-experimental	Status at birth (gestational age & birth weight), weight velocity & weight velocity interacted with weight, infant sex, measures of personal hygiene (use of soap), water quality, excreta disposal practices, food hygiene, mother's concern with preventive measures(use of preventive health care), seasonality (measure of rainfall in 14 days before survey), crowding in community or household, presence…	Highly Likely	NA			NA	NA	No	>2-4 mos (RURAL)	Household surveys to assess BF status & diarrhea outcomes in 7-days prior to survey	NOT BF vs EBF	Diarrhea prevalence - percentage of infants with one or more diarrheal episodes in the 7 days prior to the survey; (Diarrhea not defined)	not provided	59 infants NOT BF	not provided	218 infants EBF	RR: 13.72	6.14-21.30	-	N.A.	Recall bias associated with interviews
Breastfeeding and diarrheal morbidity	Popkin	1990	Pediatrics 1990; 86(6): 874-82	1983-1985	Philippines	Cebu, Mandaue, and Lapu	Rural	-	Community	No	NA	NA	NA	NA	NA	0.074	Prospective cohort	Not Quasi-experimental	Status at birth (gestational age & birth weight), weight velocity & weight velocity interacted with weight, infant sex, measures of personal hygiene (use of soap), water quality, excreta disposal practices, food hygiene, mother's concern with preventive measures(use of preventive health care), seasonality (measure of rainfall in 14 days before survey), crowding in community or household, presence…	Highly Likely	NA			NA	NA	No	>4-6 mos (RURAL)	Household surveys to assess BF status & diarrhea outcomes in 7-days prior to survey	NOT BF vs EBF	Diarrhea prevalence - percentage of infants with one or more diarrheal episodes in the 7 days prior to the survey; (Diarrhea not defined)	not provided	66 infants NOT BF	not provided	31 infants EBF	RR: 13.45	5.24-21.66	-	N.A.	Recall bias associated with interviews
Breastfeeding and diarrheal morbidity	Popkin	1990	Pediatrics 1990; 86(6): 874-82	1983-1985	Philippines	Cebu, Mandaue, and Lapu	Urban	-	Community	No	NA	NA	NA	NA	NA	0.074	Prospective cohort	Not Quasi-experimental	Status at birth (gestational age & birth weight), weight velocity & weight velocity interacted with weight, infant sex, measures of personal hygiene (use of soap), water quality, excreta disposal practices, food hygiene, mother's concern with preventive measures(use of preventive health care), seasonality (measure of rainfall in 14 days before survey), crowding in community or household, presence…	Highly Likely	NA			NA	NA	No	0-2 mos (URBAN)	Household surveys to assess BF status & diarrhea outcomes in 7-days prior to survey	NOT BF vs EBF	Diarrhea prevalence - percentage of infants with one or more diarrheal episodes in the 7 days prior to the survey; (Diarrhea not defined)	not provided	408 infants NOT BF	not provided	524 infants EBF	RR: 5.68	4.31-7.05	-	N.A.	Recall bias associated with interviews	Fixed Effects MA used to combine RRs for overall 0-5 mos age category for a given study site: RR: 5.19 (4.64-5.81) This RR was used in the overall random effects MA in lieu of RRs for individual age groups	0-5 mos
Breastfeeding and diarrheal morbidity	Popkin	1990	Pediatrics 1990; 86(6): 874-82	1983-1985	Philippines	Cebu, Mandaue, and Lapu	Urban	-	Community	No	NA	NA	NA	NA	NA	0.074	Prospective cohort	Not Quasi-experimental	Status at birth (gestational age & birth weight), weight velocity & weight velocity interacted with weight, infant sex, measures of personal hygiene (use of soap), water quality, excreta disposal practices, food hygiene, mother's concern with preventive measures(use of preventive health care), seasonality (measure of rainfall in 14 days before survey), crowding in community or household, presence…	Highly Likely	NA			NA	NA	No	>2-4 mos (URBAN)	Household surveys to assess BF status & diarrhea outcomes in 7-days prior to survey	NOT BF vs EBF	Diarrhea prevalence - percentage of infants with one or more diarrheal episodes in the 7 days prior to the survey; (Diarrhea not defined)	not provided	513 infants NOT BF	not provided	345 infants EBF	RR: 5.64	4.52-6.76	-	N.A.	Recall bias associated with interviews
Breastfeeding and diarrheal morbidity	Popkin	1990	Pediatrics 1990; 86(6): 874-82	1983-1985	Philippines	Cebu, Mandaue, and Lapu	Urban	-	Community	No	NA	NA	NA	NA	NA	0.074	Prospective cohort	Not Quasi-experimental	Status at birth (gestational age & birth weight), weight velocity & weight velocity interacted with weight, infant sex, measures of personal hygiene (use of soap), water quality, excreta disposal practices, food hygiene, mother's concern with preventive measures(use of preventive health care), seasonality (measure of rainfall in 14 days before survey), crowding in community or household, presence…	Highly Likely	NA			NA	NA	No	>4-6 mos (URBAN)	Household surveys to assess BF status & diarrhea outcomes in 7-days prior to survey	NOT BF vs EBF	Diarrhea prevalence - percentage of infants with one or more diarrheal episodes in the 7 days prior to the survey; (Diarrhea not defined)	not provided	587 infants NOT BF	not provided	58 infants EBF	RR: 4.73	3.97-5.49	-	N.A.	Recall bias associated with interviews
Child feeding and diarrhea morbidity	Vieira	2003	Journal de Pediatria 2003; 79(5): 449-54	2001	Brazil	Feira de Santana	Urban	1999: IMR 37.37/1000 live births	Community	No	NA	NA	NA	NA	NA	NA	Cross-sectional	Not Quasi-experimental	No	Highly Likely	NA			NA	NA	No	0-6 mos	One-time questionnaire to assess BF and two-week diarrhea prevalence data	Predominantly BF vs. EBF	Diarrhea prevalence - # infant with onset of at least one episode of diarrhea during preceding 15 days/ total # infants; (Diarrhea - subjective; as determined by mother)	15 infants with diarrhea in Predominantly BF group	182 infants in Predominantly BF group	30 infants reporting diarrhea in EBF group	461 infants in EBF group	RR: 1.27	0.70-2.30	-	N.A.			0-5 mos
Child feeding and diarrhea morbidity	Vieira	2003	Journal de Pediatria 2003; 79(5): 449-54	2001	Brazil	Feira de Santana	Urban	1999: IMR 37.37/1000 live births	Community	No	NA	NA	NA	NA	NA	NA	Cross-sectional	Not Quasi-experimental	No	Highly Likely	NA			NA	NA	No	0-6 mos	One-time questionnaire to assess BF and two-week diarrhea prevalence data	NOT BF vs. EBF	Diarrhea prevalence - # infant with onset of at least one episode of diarrhea during preceding 15 days/ total # infants; (Diarrhea - subjective; as determined by mother)	26 infants reporting diarrhea in NOT BF group	219 infants in NOT BF group	30 infants reporting diarrhea in EBF group	461 infants in EBF group	RR: 1.82	1.11-3.01	-	N.A.			0-5 mos
Child feeding and diarrhea morbidity	Vieira	2003	Journal de Pediatria 2003; 79(5): 449-54	2001	Brazil	Feira de Santana	Urban	1999: IMR 37.37/1000 live births	Community	No	NA	NA	NA	NA	NA	NA	Cross-sectional	Not Quasi-experimental	No	Highly Likely	NA			NA	NA	No	0-6 mos	One-time questionnaire to assess BF and two-week diarrhea prevalence data	NOT BF vs. Predominantly BF	Diarrhea prevalence - # infant with onset of at least one episode of diarrhea during preceding 15 days/ total # infants; (Diarrhea - subjective; as determined by mother)	26 infants with diarrhea in NOT BF group	219 infants in NOT BF group	15 infants with diarrhea in Predominantly BF group	182 infants in Predominantly BF group	RR: 1.44	0.79-2.63	-	N.A.			0-5 mos
Child feeding and diarrhea morbidity	Vieira	2003	Journal de Pediatria 2003; 79(5): 449-54	2001	Brazil	Feira de Santana	Urban	1999: IMR 37.37/1000 live births	Community	No	NA	NA	NA	NA	NA	NA	Cross-sectional	Not Quasi-experimental	No	Highly Likely	NA			NA	NA	No	0-11 mos	One-time questionnaire to assess BF and two-week diarrhea prevalence data	NOT BF vs. Any BF	Diarrhea prevalence - # infant with onset of at least one episode of diarrhea during preceding 15 days/ total # infants; (Diarrhea - subjective; as determined by mother)	93 infants reporting diarrhea in NOT BF group	709 infants in NOT BF group	173 infants reporting diarrhea in Any BF group	1593 infants in Any BF group	RR: 1.21	0.95-1.53	-	N.A.			0-11 mos
DIARRHEA MORTALITY
Exclusive Breastfeeding Reduces Acute Respiratory Infections and Diarrhea Deaths Among Infants in Dhaka Slums	Arifeen	2001	Pediatrics 2001; 108(4):e67	1993-1995	Bangaldesh	Dhaka	Urban	114 per 1000 live births	Community	No	NA	NA	NA	NA	NA	0.14	Prospective Cohort	Not quasi experimental	Birth weight, time-varying BF status variable, parity	Likely	NA			NA			3d-5 mos	BF status and all-cause mortality assessed by followup visits at baseline and 1,3,6.9,12 mos of age	Predominant BF vs. EBF	Diarrhea mortality	not provided	not provided	not provided	not provided	RR: 3.88	0.78-19.20	-	N.A.		RR's calculated using numbers extracted from unpublished data Analysis excludes deaths in 2 days of life	0-5 mos
Exclusive Breastfeeding Reduces Acute Respiratory Infections and Diarrhea Deaths Among Infants in Dhaka Slums	Arifeen	2001	Pediatrics 2001; 108(4):e67	1993-1995	Bangaldesh	Dhaka	Urban	114 per 1000 live births	Community	No	NA	NA	NA	NA	NA	0.14	Prospective Cohort	Not quasi experimental	Birth weight, time-varying BF status variable, parity	Likely	NA			NA			3d-5 mos	BF status and all-cause mortality assessed by followup visits at baseline and 1,3,6.9,12 mos of age	Partially BF vs. EBF	Diarrhea mortality	not provided	not provided	not provided	not provided	RR: 5.76	1.32-25.18	-	N.A.		RR's calculated using numbers extracted from unpublished data Analysis excludes deaths in 2 days of life	0-5 mos
Exclusive Breastfeeding Reduces Acute Respiratory Infections and Diarrhea Deaths Among Infants in Dhaka Slums	Arifeen	2001	Pediatrics 2001; 108(4):e67	1993-1995	Bangaldesh	Dhaka	Urban	114 per 1000 live births	Community	No	NA	NA	NA	NA	NA	0.14	Prospective Cohort	Not quasi experimental	Birth weight, time-varying BF status variable, parity	Likely	NA			NA			3d-5 mos	BF status and all-cause mortality assessed by followup visits at baseline and 1,3,6.9,12 mos of age	NOT BF vs. EBF	Diarrhea mortality	not provided	not provided	not provided	not provided	RR: 4.31	0.21-89.8	-	N.A.		RR's calculated using numbers extracted from unpublished data Analysis excludes deaths in 2 days of life	0-5 mos
Exclusive Breastfeeding Reduces Acute Respiratory Infections and Diarrhea Deaths Among Infants in Dhaka Slums	Arifeen	2001	Pediatrics 2001; 108(4):e67	1993-1995	Bangaldesh	Dhaka	Urban	114 per 1000 live births	Community	No	NA	NA	NA	NA	NA	0.14	Prospective Cohort	Not quasi experimental	Birth weight, time-varying BF status variable, parity	Likely	NA			NA			6-11 mos	BF status and all-cause mortality assessed by followup visits at baseline and 1,3,6.9,12 mos of age	NOT BF vs. Any BF	Diarrhea mortality	not provided	not provided	not provided	not provided	RR: 2.83	0.15-54.82	-	N.A.		RR's calculated using numbers extracted from unpublished data	6-11 mos; 6-23 mos
Exclusive Breastfeeding Reduces Acute Respiratory Infections and Diarrhea Deaths Among Infants in Dhaka Slums	Arifeen	2001	Pediatrics 2001; 108(4):e67	1993-1995	Bangaldesh	Dhaka	Urban	114 per 1000 live births	Community	No	NA	NA	NA	NA	NA	0.14	Prospective Cohort	Not quasi experimental	Birth weight, time-varying BF status variable, parity	Likely	NA			NA			3d-28d	BF status and all-cause mortality assessed by followup visits at baseline and 1,3,6.9,12 mos of age	Predominantly BF vs. EBF	Diarrhea mortality	2 diarrhea deaths in Predominantly BF group	1094 children in Predominantly BF group	0 diarrhea deaths in EBF group	104 children in EBF group	RR: Can't be determined bc of zero cells	-	-	N.A.		RR's calculated using numbers extracted from unpublished data Analysis excludes deaths in 2 days of life	0-28 days (these episodes are also included in the 0-5 mos)
Exclusive Breastfeeding Reduces Acute Respiratory Infections and Diarrhea Deaths Among Infants in Dhaka Slums	Arifeen	2001	Pediatrics 2001; 108(4):e67	1993-1995	Bangaldesh	Dhaka	Urban	114 per 1000 live births	Community	No	NA	NA	NA	NA	NA	0.14	Prospective Cohort	Not quasi experimental	Birth weight, time-varying BF status variable, parity	Likely	NA			NA			3d-28d	BF status and all-cause mortality assessed by followup visits at baseline and 1,3,6.9,12 mos of age	Partially BF vs. EBF	Diarrhea mortality	1 diarrhea death in Partially BF group	390 children in Partially BF group	0 diarrhea deaths in EBF group	104 children in EBF group	RR: Can't be determined bc of zero cells	-	-	N.A.		RR's calculated using numbers extracted from unpublished data Analysis excludes deaths in 2 days of life	0-28 days (these episodes are also included in the 0-5 mos)
Exclusive Breastfeeding Reduces Acute Respiratory Infections and Diarrhea Deaths Among Infants in Dhaka Slums	Arifeen	2001	Pediatrics 2001; 108(4):e67	1993-1995	Bangaldesh	Dhaka	Urban	114 per 1000 live births	Community	No	NA	NA	NA	NA	NA	0.14	Prospective Cohort	Not quasi experimental	Birth weight, time-varying BF status variable, parity	Likely	NA			NA			3d-28d	BF status and all-cause mortality assessed by followup visits at baseline and 1,3,6.9,12 mos of age	Not BF vs. EBF	Diarrhea mortality	0 diarrhea deaths in NOT BF group	89 children in NOT BF group	0 diarrhea deaths in EBF group	104 children in EBF group	RR: Can't be determined bc of zero cells	-	-	N.A.		RR's calculated using numbers extracted from unpublished data Analysis excludes deaths in 2 days of life	0-28 days (these episodes are also included in the 0-5 mos)
Exclusive Breastfeeding Reduces Acute Respiratory Infections and Diarrhea Deaths Among Infants in Dhaka Slums	Arifeen	2001	Pediatrics 2001; 108(4):e67	1993-1995	Bangaldesh	Dhaka	Urban	114 per 1000 live births	Community	No	NA	NA	NA	NA	NA	0.14	Prospective Cohort	Not quasi experimental	Birth weight, time-varying BF status variable, parity	Likely	NA			NA			3d-28d	BF status and all-cause mortality assessed by followup visits at baseline and 1,3,6.9,12 mos of age	Partially BF vs. Predominantly BF	Diarrhea mortality	1 diarrhea death in Partially BF group	390 children in Partially BF group	2 diarrhea deaths in Predominantly BF group	1094 children in Predominantly BF group	RR: 1.40	0.13-15.42	-	N.A.		RR's calculated using numbers extracted from unpublished data Analysis excludes deaths in 2 days of life	0-28 days (these episodes are also included in the 0-5 mos)
Exclusive Breastfeeding Reduces Acute Respiratory Infections and Diarrhea Deaths Among Infants in Dhaka Slums	Arifeen	2001	Pediatrics 2001; 108(4):e67	1993-1995	Bangaldesh	Dhaka	Urban	114 per 1000 live births	Community	No	NA	NA	NA	NA	NA	0.14	Prospective Cohort	Not quasi experimental	Birth weight, time-varying BF status variable, parity	Likely	NA			NA			3d-28d	BF status and all-cause mortality assessed by followup visits at baseline and 1,3,6.9,12 mos of age	Not BF vs. Predominantly BF	Diarrhea mortality	0 diarrhea deaths in NOT BF group	89 children in NOT BF group	2 diarrhea deaths in Predominantly BF group	1094 children in Predominantly BF group	RR: Can't be determined bc of zero cells	-	-	N.A.		RR's calculated using numbers extracted from unpublished data Analysis excludes deaths in 2 days of life	0-28 days (these episodes are also included in the 0-5 mos)
Exclusive Breastfeeding Reduces Acute Respiratory Infections and Diarrhea Deaths Among Infants in Dhaka Slums	Arifeen	2001	Pediatrics 2001; 108(4):e67	1993-1995	Bangaldesh	Dhaka	Urban	114 per 1000 live births	Community	No	NA	NA	NA	NA	NA	0.14	Prospective Cohort	Not quasi experimental	Birth weight, time-varying BF status variable, parity	Likely	NA			NA			3d-28d	BF status and all-cause mortality assessed by followup visits at baseline and 1,3,6.9,12 mos of age	Not BF vs. Partially BF	Diarrhea mortality	0 diarrhea deaths in NOT BF group	89 children in NOT BF group	1 diarrhea death in Partially BF group	390 children in Partially BF group	RR: Can't be determined bc of zero cells	-	-	N.A.		RR's calculated using numbers extracted from unpublished data Analysis excludes deaths in 2 days of life	0-28 days (these episodes are also included in the 0-5 mos)
Infant feeding patterns and risks of death and hospitalization in the first half of infancy: multicentre cohort study	Bahl	2005	Bulletin of the World Health Organization 2005; 83(6): 418-26	1995-1997	Ghana, India, Peru	Kintampo, New Delhi, Lima	Urban and suburban	-	Community	No	NA	NA	NA	NA	NA	not stated	Prospective cohort	Not quasi experimental	Infant's sex, twin status, birth order and weight at enrolment (as a marker of birth weight), mother's educational level, place of defecation and household water supply.	Likely	NA			NA	NA	Vitamin A	6-26 weeks	Monthly visits to assess BF status & diarrhea mortality	Predominant BF vs. EBF	Diarrhoea-specific deaths	13 diarrhea deaths in predominant BF group	1587.2 infant-yrs contributed by predominant BF group	3 diarrhea deaths in EBF group	603.7 infant-yrs contributed by EBF group	RR: 1.65	0.47-5.77	-	N.A.	Grouped analysis for all countries	RR & 95% CI calculated in STATA using csi command Analysis excluded first 5 weeks of life	0-5 mos
Infant feeding patterns and risks of death and hospitalization in the first half of infancy: multicentre cohort study	Bahl	2005	Bulletin of the World Health Organization 2005; 83(6): 418-26	1995-1997	Ghana, India, Peru	Kintampo, New Delhi, Lima	Urban and suburban	-	Community	No	NA	NA	NA	NA	NA	not stated	Prospective cohort	Not quasi experimental	Infant's sex, twin status, birth order and weight at enrolment (as a marker of birth weight), mother's educational level, place of defecation and household water supply.	Likely	NA			NA	NA	Vitamin A	6-26 weeks	Monthly visits to assess BF status & diarrhea mortality	Partially BF vs. EBF	Diarrhoea-specific deaths	20 diarrhea deaths in partially BF group	1011.1 infant-yrs contributed by partially BF group	3 diarrhea deaths in EBF group	603.7 infant-yrs contributed by EBF group	RR: 3.98	1.19-13.35	-	N.A.	Grouped analysis for all countries	RR & 95% CI calculated in STATA using csi command Analysis excluded first 5 weeks of life	0-5 mos
Infant feeding patterns and risks of death and hospitalization in the first half of infancy: multicentre cohort study	Bahl	2005	Bulletin of the World Health Organization 2005; 83(6): 418-26	1995-1997	Ghana, India, Peru	Kintampo, New Delhi, Lima	Urban and suburban	-	Community	No	NA	NA	NA	NA	NA	not stated	Prospective cohort	Not quasi experimental	Infant's sex, twin status, birth order and weight at enrolment (as a marker of birth weight), mother's educational level, place of defecation and household water supply.	Likely	NA			NA	NA	Vitamin A	6-26 weeks	Monthly visits to assess BF status & diarrhea mortality	NOT BF vs. EBF	Diarrhoea-specific deaths	4 diarrhea deaths in NOT BF group	61.5 infant-yrs contributed by NOT BF group	3 diarrhea deaths in EBF group	603.7 infant-yrs contributed by EBF group	RR: 12. 99	2.97-56.72	-	N.A.	Grouped analysis for all countries	RR & 95% CI calculated in STATA using csi command Analysis excluded first 5 weeks of life	0-5 mos
Infant feeding patterns and risks of death and hospitalization in the first half of infancy: multicentre cohort study	Bahl	2005	Bulletin of the World Health Organization 2005; 83(6): 418-26	1995-1997	Ghana, India, Peru	Kintampo, New Delhi, Lima	Urban and suburban	-	Community	No	NA	NA	NA	NA	NA	not stated	Prospective cohort	Not quasi experimental	Infant's sex, twin status, birth order and weight at enrolment (as a marker of birth weight), mother's educational level, place of defecation and household water supply.	Likely	NA			NA	NA	Vitamin A	6-26 weeks	Monthly visits to assess BF status & diarrhea mortality	Partially BF vs. Predominantly BF	Diarrhoea-specific deaths	20 diarrhea deaths in partial BF group	1011.1 infant-yrs contributed by partial BF group	13 diarrhea deaths in predominant BF group	1587.2 infant-yrs contributed by predominant BF group	RR: 2.41	1.21-4.83	-	N.A.	Grouped analysis for all countries	RR & 95% CI calculated in STATA using csi command Analysis excluded first 5 weeks of life	0-5 mos
Infant feeding patterns and risks of death and hospitalization in the first half of infancy: multicentre cohort study	Bahl	2005	Bulletin of the World Health Organization 2005; 83(6): 418-26	1995-1997	Ghana, India, Peru	Kintampo, New Delhi, Lima	Urban and suburban	-	Community	No	NA	NA	NA	NA	NA	not stated	Prospective cohort	Not quasi experimental	Infant's sex, twin status, birth order and weight at enrolment (as a marker of birth weight), mother's educational level, place of defecation and household water supply.	Likely	NA			NA	NA	Vitamin A	6-26 weeks	Monthly visits to assess BF status & diarrhea mortality	NOT BF vs. Predominantly BF	Diarrhoea-specific deaths	4 diarrhea deaths in NOT BF group	61.5 infant-yrs contributed by NOT BF group	13 diarrhea deaths in predominant BF group	1587.2 infant-yrs contributed by predominant BF group	RR: 7.88	2.64-23.46	-	N.A.	Grouped analysis for all countries	RR & 95% CI calculated in STATA using csi command Analysis excluded first 5 weeks of life	0-5 mos
Infant feeding patterns and risks of death and hospitalization in the first half of infancy: multicentre cohort study	Bahl	2005	Bulletin of the World Health Organization 2005; 83(6): 418-26	1995-1997	Ghana, India, Peru	Kintampo, New Delhi, Lima	Urban and suburban	-	Community	No	NA	NA	NA	NA	NA	not stated	Prospective cohort	Not quasi experimental	Infant's sex, twin status, birth order and weight at enrolment (as a marker of birth weight), mother's educational level, place of defecation and household water supply.	Likely	NA			NA	NA	Vitamin A	6-26 weeks	Monthly visits to assess BF status & diarrhea mortality	NOT BF vs. Partially BF	Diarrhoea-specific deaths	4 diarrhea deaths in NOT BF group	61.5 infant-yrs contributed by NOT BF group	20 diarrhea deaths in partial BF group	1011.1 infant-yrs contributed by partial BF group	RR: 3.26	1.15-9.25	-	N.A.	Grouped analysis for all countries	RR & 95% CI calculated in STATA using csi command Analysis excluded first 5 weeks of life	0-5 mos
Mortalidad postneonatal por diarrea: estudio de casos y controles	Garrido	1990	Salud Publica de Mexico 1990; 32(3): 261-8	1988-1989	Mexico	Estado de Mexico, Naucalpan de Juárez	Urban	-	Community/ Hospital	No	NA	NA	NA	NA	NA	not stated	Case-control	Not quasi experimental	Age, place of residence, repeated episodes of illness, lack of adequate sanitation/water system	Highly Likely	NA			NA	NA	No	7d-11 mos	Cases (basic cause of death corresponding to the group of infectious intestinal illnesses-internationl code 001-009) identified through civil registries and community health workers identified cases that escaped civil registry; BF status obtained through interview within 15 days of death. Three controls with no history of illness in 15 days prior to interview matched to each case on age & place o…	Partial BF vs. Predominant BF	Diarrhea -specific mortality	37 diarrhea deaths in Partial BF group	148 infants in Partial BF group	3 diarrhea deaths in Pred BF group	47 infants in Pred BF group	Adj OR: 3.8 RR: 3.92	1.0-15.3 1.27-12.12	-	N.A.		RR & 95% CI calculated in STATA using csi command Excluded infants from 0-6 days	0-11 mos
Mortalidad postneonatal por diarrea: estudio de casos y controles	Garrido	1990	Salud Publica de Mexico 1990; 32(3): 261-8	1988-1989	Mexico	Estado de Mexico, Naucalpan de Juárez	Urban	-	Community/ Hospital	No	NA	NA	NA	NA	NA	not stated	Case-control	Not quasi experimental	Age, place of residence, repeated episodes of illness, lack of adequate sanitation/water system	Highly Likely	NA			NA	NA	No	7d-11 mos	Cases (basic cause of death corresponding to the group of infectious intestinal illnesses-internationl code 001-009) identified through civil registries and community health workers identified cases that escaped civil registry; BF status obtained through interview within 15 days of death. Three controls with no history of illness in 15 days prior to interview matched to each case on age & place o…	NOT BF vs. Predominant BF	Diarrhea -specific mortality	22 deaths in NOT BF group	52 infants in NOT BF group	3 diarrhea deaths in Pred BF group	47 infants in Pred BF group	Adj OR: 7.6 RR: 6.63	1.8-31.4 2.12-20.7	-	N.A.		RR & 95% CI calculated in STATA using csi command Excluded infants from 0-6 days	0-11 mos
Mortalidad postneonatal por diarrea: estudio de casos y controles	Garrido	1990	Salud Publica de Mexico 1990; 32(3): 261-8	1988-1989	Mexico	Estado de Mexico, Naucalpan de Juárez	Urban	-	Community/ Hospital	No	NA	NA	NA	NA	NA	not stated	Case-control	Not quasi experimental	Age, place of residence, repeated episodes of illness, lack of adequate sanitation/water system	Highly Likely	NA			NA	NA	No	7d-11 mos	Cases (basic cause of death corresponding to the group of infectious intestinal illnesses-internationl code 001-009) identified through civil registries and community health workers identified cases that escaped civil registry; BF status obtained through interview within 15 days of death. Three controls with no history of illness in 15 days prior to interview matched to each case on age & place o…	NOT BF vs. Partial BF	Diarrhea -specific mortality	22 deaths in NOT BF group	52 infants in NOT BF group	37 diarrhea deaths in Partial BF group	148 infants in Partial BF group	RR: 1.69	1.11-2.58	-	N.A.		RR & 95% CI calculated in STATA using csi command Excluded infants from 0-6 days	0-11 mos
Prolonged breast feeding, diarrheal disease, and survival of children in Guinea-Bissau	Molbak	1994	BMJ 1994; 308: 1403-1406	1987-1990	Guinea-Bissau	Bissau, Bandim II	Peri-urban	-	Community	No	NA	NA	NA	NA	NA	not stated	Prospective cohort	Not Quasi-experimental	Age	Highly Likely	NA			NA	No	No	12-35 mos	Weekly household interviews to obtain feeding & diarrhea info	NOT BF vs. Partially Breastfed	# Diarrhea Deaths per 100 child years	29 diarrhea deaths in NOT BF group	425 child-yrs contributed by NOT BF group	15 diarrhea deaths in partially BF group	284 child-yrs contributed by partially BF group	RR: 3.5	1.4-8.3	-	N.A.	No definition provided for diarrhea	Excluded infants 0-11 months	12-23 mos; 6-23 mos
Evidence for protection from breastfeeding against infant deaths from infectious diseases in Brazil	Victora	1987	Lancet 1987; 2(8554):319-22	1984-1985	Brazil	Porto Alegre and Pelotas	Urban	40/1000 live births	Hospital/Health Center	No	NA	NA	NA	NA	NA	not stated	Case-control	Not Quasi-experimental	Age, social status, birth weight, maternal education, family income, non-milk supplements given	Not Likely	NA			NA	NA	No	7d - 11 mos (364 days)	Cause of death for cases obtained from hospital records, death certficate and/or parent report; feeding mode immediately prior to terminal illness obtained from parent interview. Two controls chosen from neighborhood for every case; feeding status obtained for controls by mother interview for last symptom-free day	Partial BF vs. Predominant (where partial is breast+other milk)	Cause of death documented as diarrhea	not provided	not provided	not provided	not provided	Adj RR: 5.7	2.0-16.8	-	N.A.		Presents same data as Victora. Am J Epi. 1989; 129(5): 1032-41 Fixed Effects MA used to combine RRs for overall partial vs. predominant comparison RR: 4.32 (2.04-9.17) This RR was used in the overall random effects MA in lieu of RRs for individual age groups Excluded deaths ocurring in first week of life	0-11 mos
Evidence for protection from breastfeeding against infant deaths from infectious diseases in Brazil	Victora	1987	Lancet 1987; 2(8554):319-22	1984-1985	Brazil	Porto Alegre and Pelotas	Urban	40/1000 live births	Hospital/Health Center	No	NA	NA	NA	NA	NA	not stated	Case-control	Not Quasi-experimental	Age, social status, birth weight, maternal education, family income, non-milk supplements given	Not Likely	NA			NA	NA	No	7d - 11 mos (364 days)	Cause of death for cases obtained from hospital records, death certficate and/or parent report; feeding mode immediately prior to terminal illness obtained from parent interview. Two controls chosen from neighborhood for every case; feeding status obtained for controls by mother interview for last symptom-free day	Partial BF vs. Predominant (where partial is breast+non-milk supplement)	Cause of death documented as diarrhea	not provided	not provided	not provided	not provided	Adj RR: 2.6	0.4-15.4	-	N.A.			0-11 mos
Evidence for protection from breastfeeding against infant deaths from infectious diseases in Brazil	Victora	1987	Lancet 1987; 2(8554):319-22	1984-1985	Brazil	Porto Alegre and Pelotas	Urban	40/1000 live births	Hospital/Health Center	No	NA	NA	NA	NA	NA	not stated	Case-control	Not Quasi-experimental	Age, social status, birth weight, maternal education, family income, non-milk supplements given	Not Likely	NA			NA	NA	No	7d - 11 mos (364 days)	Cause of death for cases obtained from hospital records, death certficate and/or parent report; feeding mode immediately prior to terminal illness obtained from parent interview. Two controls chosen from neighborhood for every case; feeding status obtained for controls by mother interview for last symptom-free day	Partial BF vs. Predominant (where partial is breast+other milk +non-milk)	Cause of death documented as diarrhea	not provided	not provided	not provided	not provided	Adj RR: 3.7	1.0-13.6	-	N.A.			0-11 mos
Evidence for protection from breastfeeding against infant deaths from infectious diseases in Brazil	Victora	1987	Lancet 1987; 2(8554):319-22	1984-1985	Brazil	Porto Alegre and Pelotas	Urban	40/1000 live births	Hospital/Health Center	No	NA	NA	NA	NA	NA	not stated	Case-control	Not Quasi-experimental	Age, social status, birth weight, maternal education, family income, non-milk supplements given	Not Likely	NA			NA	NA	No	7d - 11 mos (364 days)	Cause of death for cases obtained from hospital records, death certficate and/or parent report; feeding mode immediately prior to terminal illness obtained from parent interview. Two controls chosen from neighborhood for every case; feeding status obtained for controls by mother interview for last symptom-free day	NOT BF vs. Predominant (where NOT BF is milk other than breast only)	Cause of death documented as diarrhea	not provided	not provided	not provided	not provided	RR: 18.3	6.7-50.1	-	N.A.		Presents same data as Victora. Am J Epi. 1989; 129(5): 1032-41 Fixed Effects MA used to combine RRs for overall NOT BF vs. predominant comparison RR: 17.15 (7.9-37.24) This RR was used in the overall random effects MA in lieu of RRs for individual age groups Excluded deaths ocurring in first week of life	0-11 mos
Evidence for protection from breastfeeding against infant deaths from infectious diseases in Brazil	Victora	1987	Lancet 1987; 2(8554):319-22	1984-1985	Brazil	Porto Alegre and Pelotas	Urban	40/1000 live births	Hospital/Health Center	No	NA	NA	NA	NA	NA	not stated	Case-control	Not Quasi-experimental	Age, social status, birth weight, maternal education, family income, non-milk supplements given	Not Likely	NA			NA	NA	No	7d - 11 mos (364 days)	Cause of death for cases obtained from hospital records, death certficate and/or parent report; feeding mode immediately prior to terminal illness obtained from parent interview. Two controls chosen from neighborhood for every case; feeding status obtained for controls by mother interview for last symptom-free day	NOT BF vs. Predominant (where NOT BF is milk other than breast +non-milk supplement)	Cause of death documented as diarrhea	not provided	not provided	not provided	not provided	RR: 15.6	4.6-52.4	-	N.A.			0-11 mos
Effect of not breastfeeding on the risk of diarrheal and respiratory mortality in children under 2 years of age in Metro Cebu, The Philippines	Yoon	1996	American Journal of Epidemiology 1996; 143: 1142-48	1988-1991	Philippines	Metro Cebu	Rural and urban	-	Community	No	NA	NA	NA	NA	NA	not stated	Prospective cohort	Not quasi experimental	Child age and nutritional status, maternal eduaction, type of toilet and length of previous birth interval	Likely	NA			NA	NA	No	6-11 mos	Household census, baseline survey & followup surveys at 6 mos intervals to assess BF status; Diarrhea-specific mortality assessed by health worker mortality surveillance and post-mortem interviews with mother and/or caretaker	NOT BF vs. Any BF	Diarrhea-specific mortality	not provided	not provided	not provided	not provided	Adj RR: 1.4	0.62-3.2	-	N.A.		Total # of diarrhea deaths = 26 deaths; Total # of deaths stratified by feeding mode was not reported	6-11 mos; 6-23 mos
Effect of not breastfeeding on the risk of diarrheal and respiratory mortality in children under 2 years of age in Metro Cebu, The Philippines	Yoon	1996	American Journal of Epidemiology 1996; 143: 1142-48	1988-1991	Philippines	Metro Cebu	Rural and urban	-	Community	No	NA	NA	NA	NA	NA	not stated	Prospective cohort	Not quasi experimental	Child age and nutritional status, maternal eduaction, type of toilet and length of previous birth interval	Likely	NA			NA	NA	No	12-23 mos	Household census, baseline survey & followup surveys at 6 mos intervals to assess BF status; Diarrhea-specific mortality assessed by health worker mortality surveillance and post-mortem interviews with mother and/or caretaker	NOT BF vs. Any BF	Diarrhea-specific mortality	not provided	not provided	not provided	not provided	Adj RR: 1.4	0.37-5.6	-	N.A.		Total # of diarrhea deaths = 11 deaths; Total # of deaths stratified by feeding mode was not reported	12-23 mos; 6-23 mos
ALL-CAUSE MORTALITY
Exclusive Breastfeeding Reduces Acute Respiratory Infections and Diarrhea Deaths Among Infants in Dhaka Slums	Arifeen	2001	Pediatrics 2001; 108(4):e67	1993-1995	Bangaldesh	Dhaka	Urban	114 per 1000 live births	Community	No	NA	NA	NA	NA	NA	0.14	Prospective Cohort	Not quasi experimental	Birth weight, time-varying BF status variable, income, education, parity	Likely	NA			NA	NA	No	3d-5 mos	BF status and all-cause mortality assessed by followup visits at baseline and 1,3,6.9,12 mos of age	Predominant BF vs. EBF	All cause mortality	not provided	not provided	not provided	not provided	RR: 1.88	1.12-3.17	-	N.A.		RR's calculated using numbers extracted from unpublished data Analysis excludes deaths in 2 days of life	0-5 mos
Exclusive Breastfeeding Reduces Acute Respiratory Infections and Diarrhea Deaths Among Infants in Dhaka Slums	Arifeen	2001	Pediatrics 2001; 108(4):e67	1993-1995	Bangaldesh	Dhaka	Urban	114 per 1000 live births	Community	No	NA	NA	NA	NA	NA	0.14	Prospective Cohort	Not quasi experimental	Birth weight, time-varying BF status variable, income, education, parity	Likely	NA			NA	NA	No	3d-5 mos	BF status and all-cause mortality assessed by followup visits at baseline and 1,3,6.9,12 mos of age	Partial vs. EBF	All cause mortality	not provided	not provided	not provided	not provided	RR: 2.40	1.52-3.80	-	N.A.		RR's calculated using numbers extracted from unpublished data Analysis excludes deaths in 2 days of life	0-5 mos
Exclusive Breastfeeding Reduces Acute Respiratory Infections and Diarrhea Deaths Among Infants in Dhaka Slums	Arifeen	2001	Pediatrics 2001; 108(4):e67	1993-1995	Bangaldesh	Dhaka	Urban	114 per 1000 live births	Community	No	NA	NA	NA	NA	NA	0.14	Prospective Cohort	Not quasi experimental	Birth weight, time-varying BF status variable, income, education, parity	Likely	NA			NA	NA	No	3d-5 mos	BF status and all-cause mortality assessed by followup visits at baseline and 1,3,6.9,12 mos of age	NOT BF vs. EBF	All cause mortality	not provided	not provided	not provided	not provided	RR: 21.56	12.26-37.94	-	N.A.		RR's calculated using numbers extracted from unpublished data Analysis excludes deaths in 2 days of life	0-5 mos
Exclusive Breastfeeding Reduces Acute Respiratory Infections and Diarrhea Deaths Among Infants in Dhaka Slums	Arifeen	2001	Pediatrics 2001; 108(4):e67	1993-1995	Bangaldesh	Dhaka	Urban	114 per 1000 live births	Community	No	NA	NA	NA	NA	NA	0.14	Prospective Cohort	Not quasi experimental	Birth weight, time-varying BF status variable, income, education, parity	Likely	NA			NA	NA	No	6-11 mos	BF status and all-cause mortality assessed by followup visits at baseline and 1,3,6.9,12 mos of age	Not BF vs. Any BF	All cause mortality	not provided	not provided	not provided	not provided	RR: 5.66	1.86-17.20	-	N.A.		RR's calculated using numbers extracted from unpublished data	6-11 mos; 6-23 mos
Exclusive Breastfeeding Reduces Acute Respiratory Infections and Diarrhea Deaths Among Infants in Dhaka Slums	Arifeen	2001	Pediatrics 2001; 108(4):e67	1993-1995	Bangaldesh	Dhaka	Urban	114 per 1000 live births	Community	No	NA	NA	NA	NA	NA	0.14	Prospective Cohort	Not quasi experimental	Birth weight, time-varying BF status variable, income, education, parity	Likely	NA			NA	NA	No	3d-28d	BF status and all-cause mortality assessed by followup visits at baseline and 1,3,6.9,12 mos of age	Predominantly BF vs. EBF	All cause mortality	19 all-cause deaths in Predominantly BF group	1094 children in Predominantly BF group	2 all-cause deaths in EBF group	104 children in EBF group	RR: 0.90	0.21-3.82	-	N.A.		RR's calculated using numbers extracted from unpublished data Analysis excludes deaths in 2 days of life	0-28 days (these episodes are also included in the 0-5 mos)
Exclusive Breastfeeding Reduces Acute Respiratory Infections and Diarrhea Deaths Among Infants in Dhaka Slums	Arifeen	2001	Pediatrics 2001; 108(4):e67	1993-1995	Bangaldesh	Dhaka	Urban	114 per 1000 live births	Community	No	NA	NA	NA	NA	NA	0.14	Prospective Cohort	Not quasi experimental	Birth weight, time-varying BF status variable, income, education, parity	Likely	NA			NA	NA	No	3d-28d	BF status and all-cause mortality assessed by followup visits at baseline and 1,3,6.9,12 mos of age	Partially BF vs. EBF	All cause mortality	9 all-cause deaths in Partially BF group	390 children in Partially BF group	2 all-cause deaths in EBF group	104 children in EBF group	RR: 1.20	0.26-5.47	-	N.A.		RR's calculated using numbers extracted from unpublished data Analysis excludes deaths in 2 days of life	0-28 days (these episodes are also included in the 0-5 mos)
Exclusive Breastfeeding Reduces Acute Respiratory Infections and Diarrhea Deaths Among Infants in Dhaka Slums	Arifeen	2001	Pediatrics 2001; 108(4):e67	1993-1995	Bangaldesh	Dhaka	Urban	114 per 1000 live births	Community	No	NA	NA	NA	NA	NA	0.14	Prospective Cohort	Not quasi experimental	Birth weight, time-varying BF status variable, income, education, parity	Likely	NA			NA	NA	No	3d-28d	BF status and all-cause mortality assessed by followup visits at baseline and 1,3,6.9,12 mos of age	Not BF vs. EBF	All cause mortality	3 all-cause deaths in NOT BF group	89 children in NOT BF group	2 all-cause deaths in EBF group	104 children in EBF group	RR: 1.75	0.30-10.26	-	N.A.		RR's calculated using numbers extracted from unpublished data Analysis excludes deaths in 2 days of life	0-28 days (these episodes are also included in the 0-5 mos)
Exclusive Breastfeeding Reduces Acute Respiratory Infections and Diarrhea Deaths Among Infants in Dhaka Slums	Arifeen	2001	Pediatrics 2001; 108(4):e67	1993-1995	Bangaldesh	Dhaka	Urban	114 per 1000 live births	Community	No	NA	NA	NA	NA	NA	0.14	Prospective Cohort	Not quasi experimental	Birth weight, time-varying BF status variable, income, education, parity	Likely	NA			NA	NA	No	3d-28d	BF status and all-cause mortality assessed by followup visits at baseline and 1,3,6.9,12 mos of age	Partially BF vs. Predominantly BF	All cause mortality	9 all-cause deaths in Partially BF group	390 children in Partially BF group	19 all-cause deaths in Predominantly BF group	1094 children in Predominantly BF group	RR: 1.33	0.61-2.91	-	N.A.		RR's calculated using numbers extracted from unpublished data Analysis excludes deaths in 2 days of life	0-28 days (these episodes are also included in the 0-5 mos)
Exclusive Breastfeeding Reduces Acute Respiratory Infections and Diarrhea Deaths Among Infants in Dhaka Slums	Arifeen	2001	Pediatrics 2001; 108(4):e67	1993-1995	Bangaldesh	Dhaka	Urban	114 per 1000 live births	Community	No	NA	NA	NA	NA	NA	0.14	Prospective Cohort	Not quasi experimental	Birth weight, time-varying BF status variable, income, education, parity	Likely	NA			NA	NA	No	3d-28d	BF status and all-cause mortality assessed by followup visits at baseline and 1,3,6.9,12 mos of age	Not BF vs. Predominantly BF	All cause mortality	3 all-cause deaths in NOT BF group	89 children in NOT BF group	19 all-cause deaths in Predominantly BF group	1094 children in Predominantly BF group	RR: 1.94	0.59-6.43	-	N.A.		RR's calculated using numbers extracted from unpublished data Analysis excludes deaths in 2 days of life	0-28 days (these episodes are also included in the 0-5 mos)
Exclusive Breastfeeding Reduces Acute Respiratory Infections and Diarrhea Deaths Among Infants in Dhaka Slums	Arifeen	2001	Pediatrics 2001; 108(4):e67	1993-1995	Bangaldesh	Dhaka	Urban	114 per 1000 live births	Community	No	NA	NA	NA	NA	NA	0.14	Prospective Cohort	Not quasi experimental	Birth weight, time-varying BF status variable, income, education, parity	Likely	NA			NA	NA	No	3d-28d	BF status and all-cause mortality assessed by followup visits at baseline and 1,3,6.9,12 mos of age	Not BF vs. Partially BF	All cause mortality	3 all-cause deaths in NOT BF group	89 children in NOT BF group	9 all-cause deaths in Partially BF group	390 children in Partially BF group	RR: 1.46	0.40-5.29	-	N.A.		RR's calculated using numbers extracted from unpublished data Analysis excludes deaths in 2 days of life	0-28 days (these episodes are also included in the 0-5 mos)
Infant feeding patterns and risks of death and hospitalization in the first half of infancy: multicentre cohort study	Bahl	2005	Bulletin of the World Health Organization 2005; 83(6): 418-26	1995-1997	Ghana, India, Peru	Kintampo, New Delhi, Lima	Urban and suburban	-	Community	No	NA	NA	NA	NA	NA	not stated	Prospective cohort	Not quasi experimental	Infant's sex, twin status, birth order and weight at enrolment (as a marker of birth weight), mother's educational level, place of defecation and household water supply.	Likely	NA			NA	NA	Vitamin A	6-26 weeks	Monthly visits to assess BF status & all-cause mortality	Predominant BF vs. EBF	All-cause mortality	38 all-cause deaths in predominant BF group	1587.2 infant-yrs contributed by predominant BF group	13 all-cause deaths in EBF group	603.7 infant-yrs contributed by EBF group	RR: 1.11	0.60-2.07	-	N.A.		RR & 95% CI calculated in STATA using csi command Analysis excluded first 5 weeks of life	0-5 mos
Infant feeding patterns and risks of death and hospitalization in the first half of infancy: multicentre cohort study	Bahl	2005	Bulletin of the World Health Organization 2005; 83(6): 418-26	1995-1997	Ghana, India, Peru	Kintampo, New Delhi, Lima	Urban and suburban	-	Community	No	NA	NA	NA	NA	NA	not stated	Prospective cohort	Not quasi experimental	Infant's sex, twin status, birth order and weight at enrolment (as a marker of birth weight), mother's educational level, place of defecation and household water supply.	Likely	NA			NA	NA	Vitamin A	6-26 weeks	Monthly visits to assess BF status & all-cause mortality	Partially BF vs. EBF	All-cause mortality	41 all-cause deaths in Partially BF group	1011.1 infant-yrs contributed by partially BF group	13 all-cause deaths in EBF group	603.7 infant-yrs contributed by EBF group	RR: 1.88	1.02-3.49	-	N.A.		RR & 95% CI calculated in STATA using csi command Analysis excluded first 5 weeks of life	0-5 mos
Infant feeding patterns and risks of death and hospitalization in the first half of infancy: multicentre cohort study	Bahl	2005	Bulletin of the World Health Organization 2005; 83(6): 418-26	1995-1997	Ghana, India, Peru	Kintampo, New Delhi, Lima	Urban and suburban	-	Community	No	NA	NA	NA	NA	NA	not stated	Prospective cohort	Not quasi experimental	Infant's sex, twin status, birth order and weight at enrolment (as a marker of birth weight), mother's educational level, place of defecation and household water supply.	Likely	NA			NA	NA	Vitamin A	6-26 weeks	Monthly visits to assess BF status & all-cause mortality	NOT BF vs. EBF	All-cause mortality	12 all-cause deaths in NOT BF group	61.5 infant-yrs contributed by NOT BF group	13 all-cause deaths in EBF group	603.7 infant-yrs contributed by EBF group	RR: 8.99	4.29-18.84	-	N.A.		RR & 95% CI calculated in STATA using csi command Analysis excluded first 5 weeks of life	0-5 mos
Infant feeding patterns and risks of death and hospitalization in the first half of infancy: multicentre cohort study	Bahl	2005	Bulletin of the World Health Organization 2005; 83(6): 418-26	1995-1997	Ghana, India, Peru	Kintampo, New Delhi, Lima	Urban and suburban	-	Community	No	NA	NA	NA	NA	NA	not stated	Prospective cohort	Not quasi experimental	Infant's sex, twin status, birth order and weight at enrolment (as a marker of birth weight), mother's educational level, place of defecation and household water supply.	Likely	NA			NA	NA	Vitamin A	6-26 weeks	Monthly visits to assess BF status & all-cause mortality	Partially BF vs. Predominantly	All-cause mortality	41 all-cause deaths in Partially BF group	1011.1 infant-yrs contributed by partially BF group	38 all-cause deaths in predominant BF group	1587.2 infant-yrs contributed by predominant BF group	RR: 1.69	1.10-2.61	-	N.A.		RR & 95% CI calculated in STATA using csi command Analysis excluded first 5 weeks of life	0-5 mos
Infant feeding patterns and risks of death and hospitalization in the first half of infancy: multicentre cohort study	Bahl	2005	Bulletin of the World Health Organization 2005; 83(6): 418-26	1995-1997	Ghana, India, Peru	Kintampo, New Delhi, Lima	Urban and suburban	-	Community	No	NA	NA	NA	NA	NA	not stated	Prospective cohort	Not quasi experimental	Infant's sex, twin status, birth order and weight at enrolment (as a marker of birth weight), mother's educational level, place of defecation and household water supply.	Likely	NA			NA	NA	Vitamin A	6-26 weeks	Monthly visits to assess BF status & all-cause mortality	NOT BF vs. Predominantly	All-cause mortality	12 all-cause deaths in NOT BF group	61.5 infant-yrs contributed by NOT BF group	38 all-cause deaths in predominant BF group	1587.2 infant-yrs contributed by predominant BF group	RR: 8.08	4.45-14.69	-	N.A.		RR & 95% CI calculated in STATA using csi command Analysis excluded first 5 weeks of life	0-5 mos
Infant feeding patterns and risks of death and hospitalization in the first half of infancy: multicentre cohort study	Bahl	2005	Bulletin of the World Health Organization 2005; 83(6): 418-26	1995-1997	Ghana, India, Peru	Kintampo, New Delhi, Lima	Urban and suburban	-	Community	No	NA	NA	NA	NA	NA	not stated	Prospective cohort	Not quasi experimental	Infant's sex, twin status, birth order and weight at enrolment (as a marker of birth weight), mother's educational level, place of defecation and household water supply.	Likely	NA			NA	NA	Vitamin A	6-26 weeks	Monthly visits to assess BF status & all-cause mortality	NOT BF vs. Partially BF	All-cause mortality	12 all-cause deaths in NOT BF group	61.5 infant-yrs contributed by NOT BF group	41 all-cause deaths in Partially BF group	1011.1 infant-yrs contributed by partially BF group	RR: 4.77	2.65-8.61	-	N.A.		RR & 95% CI calculated in STATA using csi command Analysis excluded first 5 weeks of life	0-5 mos
Breastfeeding, nutritional state, and child survival in rural Bangladesh	Briend	1988	British Medical Journal 1988; 296: 879-82	Not stated	Bangladesh	Matlab	Rural	-	Community	No	NA	NA	NA	NA	NA	not stated	Prospective cohort	Not Quasi-experimental	Age	Highly Likely	NA			NA	No	No	12-23 mos	Monthly visits to assess BF status & all-cause mortality	Not BF vs. Any BF	All-cause mortality	3 deaths in NOT BF group	929 child months observed in NOT BF group	17 deaths in BF group	11730 child months observed in BF group	RR: 2.23	0.65-7.59	-	N.A.		RR & 95% CI calculated in STATA using csi command Excluded infants 0-11 mos	12-23 mos; 6-23 mos
Delayed breastfeeding initiation increases risk of neonatal mortality	Edmond	2006	Pediatrics 2006; 117: e380-6	2003-2004	Ghana	Kintampo, Wenchi, Techiman, Nkoranza	Rural	-	Community	No	NA	NA	NA	NA	NA	not stated	Prospective cohort	Not quasi experimental	Gender, birth size, gestational age, presence of congenital anomaly, health on day of birth, health at time of interview, mother's health at time of delivery, age of mother, parity, maternal education, mother having cash income, household water supply, place of defecation, number of antenatal visits, place o f birth, birth attendant, timing of initiation of BF	Highly Likely	NA			NA	No	Vitamin A	2-28 days	Birth questionnaire to assess BF status; All-cause mortality assessed at 4-week follow-up visit	Predominant BF vs. EBF	All-cause mortality	48 deaths in predominantly BF group	3034 infants in predominantly BF group	84 deaths in EBF group	7680 infants in EBF group	Adj OR: 1.30 RR: 1.45	0.90-1.87 1.02-2.06	-	N.A.		RR & 95% CI calculated in STATA using csi command Excluded deaths occuring at 0-1 days of age; excluding deaths occurring at 0-7 days of age did not have any statistically significant difference on effect size	0-5 mos; 0-28 days
Delayed breastfeeding initiation increases risk of neonatal mortality	Edmond	2006	Pediatrics 2006; 117: e380-6	2003-2004	Ghana	Kintampo, Wenchi, Techiman, Nkoranza	Rural	-	Community	No	NA	NA	NA	NA	NA	not stated	Prospective cohort	Not quasi experimental	Gender, birth size, gestational age, presence of congenital anomaly, health on day of birth, health at time of interview, mother's health at time of delivery, age of mother, parity, maternal education, mother having cash income, household water supply, place of defecation, number of antenatal visits, place o f birth, birth attendant, timing of initiation of BF	Highly Likely	NA			NA	No	Vitamin A	2-28 days	Birth questionnaire to assess BF status; All-cause mortality assessed at 4-week follow-up visit	Partial BF vs. EBF	All-cause mortality	13 deaths in partially BF group	233 infants in partially BF group	84 deaths in EBF group	7680 infants in EBF group	Adj OR: 3.82 RR: 5.10	1.99-7.34 1.02-2.06	-	N.A.		RR & 95% CI calculated in STATA using csi command Excluded deaths occuring at 0-1 days of age; excluding deaths occurring at 0-7 days of age did not have any statistically significant difference on effect size	0-5 mos; 0-28 days
DIARRHEA HOSPITALIZATION								-
Infant feeding patterns and risks of death and hospitalization in the first half of infancy: multicentre cohort study	Bahl	2005	Bulletin of the World Health Organization 2005; 83(6): 418-26	1995-1997	Ghana, India, Peru	Kintampo, New Delhi, Lima	Urban and suburban	-	Community	No	NA	NA	NA	NA	NA	not stated	Prospective cohort	Not quasi experimental	Infant's sex, twin status, birth order and weight at enrolment (as a marker of birth weight), mother's educational level, place of defecation and household water supply.	Highly Likely	NA			NA	NA	Vitamin A	6-26 weeks	Monthly visits to assess BF status & diarrhea hospitalizations	Predominant BF vs. EBF	Diarrhea-specific hospitalization	24 hospitalizations in predominant BF group	1587.2 infant-yrs contributed by predominant BF group	4 hospitalizations in EBF group	603.7 infant-yrs contributed by EBF group	RR: 2.28	0.80-6.55	-	N.A.		RR & 95% CI calculated in STATA using csi command	0-5 mos
Infant feeding patterns and risks of death and hospitalization in the first half of infancy: multicentre cohort study	Bahl	2005	Bulletin of the World Health Organization 2005; 83(6): 418-26	1995-1997	Ghana, India, Peru	Kintampo, New Delhi, Lima	Urban and suburban	-	Community	No	NA	NA	NA	NA	NA	not stated	Prospective cohort	Not quasi experimental	Infant's sex, twin status, birth order and weight at enrolment (as a marker of birth weight), mother's educational level, place of defecation and household water supply.	Highly Likely	NA			NA	NA	Vitamin A	6-26 weeks	Monthly visits to assess BF status & diarrhea hospitalizations	Partially BF vs. EBF	Diarrhea-specific hospitalization	33 hospitalizations in partially BF group	1011.1 infant-yrs contributed by partially BF group	4 hospitalizations in EBF group	603.7 infant-yrs contributed by EBF group	RR: 4.93	1.75-13.84	-	N.A.		RR & 95% CI calculated in STATA using csi command	0-5 mos
Infant feeding patterns and risks of death and hospitalization in the first half of infancy: multicentre cohort study	Bahl	2005	Bulletin of the World Health Organization 2005; 83(6): 418-26	1995-1997	Ghana, India, Peru	Kintampo, New Delhi, Lima	Urban and suburban	-	Community	No	NA	NA	NA	NA	NA	not stated	Prospective cohort	Not quasi experimental	Infant's sex, twin status, birth order and weight at enrolment (as a marker of birth weight), mother's educational level, place of defecation and household water supply.	Highly Likely	NA			NA	NA	Vitamin A	6-26 weeks	Monthly visits to assess BF status & diarrhea hospitalizations	NOT BF vs. EBF	Diarrhea-specific hospitalization	8 hospitalizations in NOT BF group	61.5 infant-yrs contributed by NOT BF group	4 hospitalizations in EBF group	603.7 infant-yrs contributed by EBF group	RR: 19.48	6.04-62.87	-	N.A.		RR & 95% CI calculated in STATA using csi command	0-5 mos
Infant feeding patterns and risks of death and hospitalization in the first half of infancy: multicentre cohort study	Bahl	2005	Bulletin of the World Health Organization 2005; 83(6): 418-26	1995-1997	Ghana, India, Peru	Kintampo, New Delhi, Lima	Urban and suburban	-	Community	No	NA	NA	NA	NA	NA	not stated	Prospective cohort	Not quasi experimental	Infant's sex, twin status, birth order and weight at enrolment (as a marker of birth weight), mother's educational level, place of defecation and household water supply.	Highly Likely	NA			NA	NA	Vitamin A	6-26 weeks	Monthly visits to assess BF status & diarrhea hospitalizations	Partially BF vs. Predominantly BF	Diarrhea-specific hospitalization	33 hospitalizations in partially BF group	1011.1 infant-yrs contributed by partially BF group	24 hospitalizations in predominant BF group	1587.2 infant-yrs contributed by predominant BF group	RR: 2.16	1.28-3.63	-	N.A.		RR & 95% CI calculated in STATA using csi command	0-5 mos
Infant feeding patterns and risks of death and hospitalization in the first half of infancy: multicentre cohort study	Bahl	2005	Bulletin of the World Health Organization 2005; 83(6): 418-26	1995-1997	Ghana, India, Peru	Kintampo, New Delhi, Lima	Urban and suburban	-	Community	No	NA	NA	NA	NA	NA	not stated	Prospective cohort	Not quasi experimental	Infant's sex, twin status, birth order and weight at enrolment (as a marker of birth weight), mother's educational level, place of defecation and household water supply.	Highly Likely	NA			NA	NA	Vitamin A	6-26 weeks	Monthly visits to assess BF status & diarrhea hospitalizations	NOT BF vs. Predominantly BF	Diarrhea-specific hospitalization	8 hospitalizations in NOT BF group	61.5 infant-yrs contributed by NOT BF group	24 hospitalizations in predominant BF group	1587.2 infant-yrs contributed by predominant BF group	RR: 8.53	3.99-18.22	-	N.A.		RR & 95% CI calculated in STATA using csi command	0-5 mos
Infant feeding patterns and risks of death and hospitalization in the first half of infancy: multicentre cohort study	Bahl	2005	Bulletin of the World Health Organization 2005; 83(6): 418-26	1995-1997	Ghana, India, Peru	Kintampo, New Delhi, Lima	Urban and suburban	-	Community	No	NA	NA	NA	NA	NA	not stated	Prospective cohort	Not quasi experimental	Infant's sex, twin status, birth order and weight at enrolment (as a marker of birth weight), mother's educational level, place of defecation and household water supply.	Highly Likely	NA			NA	NA	Vitamin A	6-26 weeks	Monthly visits to assess BF status & diarrhea hospitalizations	NOT BF vs. Partially BF	Diarrhea-specific hospitalization	8 hospitalizations in NOT BF group	61.5 infant-yrs contributed by NOT BF group	33 hospitalizations in partially BF group	1011.1 infant-yrs contributed by partially BF group	RR: 3.95	1.91-8.19	-	N.A.		RR & 95% CI calculated in STATA using csi command	0-5 mos
Infant feeding and risk of severe diarrhea in Basrah city, Iraq: a case-control study	Mahmood	1989	Bulletin of the World Health Organization 1989; 67(6): 701-06	1983-1984	Iraq	Basrah City	Urban	-	Hospital/Health Center	No	NA	NA	NA	NA	NA	not stated	Case-Control	Not Quasi-experimental	Infant age, month of selection into study, years of school education of mother, place of residence, sex, ownership of car, ownership of house, type of house in which family lives and type of infant drinking water (boiled vs. unboiled)	Likely	NA			NA	NA	No	2-3 mos	All maternal & child health clinics in area visited once during each of six 5-week periods; Interviews with mothers to assess BF status; review of hospital records and use of diagnostic tests to assess admission for diarrhea	Partial BF vs. Predominant	Diarrhea-specific hospitalization =# admissions to hospital where diarrhea is main cause for admission	not provided	not provided	not provided	not provided	RR: 6.2 Relative Risk of hospitalized diarrhea among partially BF infants as compared to Pred	2.8-14.0	-	N.A.		Fixed Effects MA used to combine RRs for overall 0-5 mos age category for a given study site: RR: 4.90 (2.51-9.55) This RR was used in the overall random effects MA in lieu of RRs for individual age groups	0-5 mos
Infant feeding and risk of severe diarrhea in Basrah city, Iraq: a case-control study	Mahmood	1989	Bulletin of the World Health Organization 1989; 67(6): 701-06	1983-1984	Iraq	Basrah City	Urban	-	Hospital/Health Center	No	NA	NA	NA	NA	NA	not stated	Case-Control	Not Quasi-experimental	Infant age, month of selection into study, years of school education of mother, place of residence, sex, ownership of car, ownership of house, type of house in which family lives and type of infant drinking water (boiled vs. unboiled)	Likely	NA			NA	NA	No	4-5 mos	All maternal & child health clinics in area visited once during each of six 5-week periods; Interviews with mothers to assess BF status; review of hospital records and use of diagnostic tests to assess admission for diarrhea	Partial BF vs. Predominant	Diarrhea-specific hospitalization =# admissions to hospital where diarrhea is main cause for admission	not provided	not provided	not provided	not provided	RR: 2.9 Relative Risk of hospitalized diarrhea among partially BF infants as compared to Pred	0.9-9.9	-	N.A.
Infant feeding and risk of severe diarrhea in Basrah city, Iraq: a case-control study	Mahmood	1989	Bulletin of the World Health Organization 1989; 67(6): 701-06	1983-1984	Iraq	Basrah City	Urban	-	Hospital/Health Center	No	NA	NA	NA	NA	NA	not stated	Case-Control	Not Quasi-experimental	Infant age, month of selection into study, years of school education of mother, place of residence, sex, ownership of car, ownership of house, type of house in which family lives and type of infant drinking water (boiled vs. unboiled)	Likely	NA			NA	NA	No	2-3 mos	All maternal & child health clinics in area visited once during each of six 5-week periods; Interviews with mothers to assess BF status; review of hospital records and use of diagnostic tests to assess admission for diarrhea	NOT BF vs. Predominantly BF	Diarrhea-specific hospitalization =# admissions to hospital where diarrhea is main cause for admission	not provided	not provided	not provided	not provided	RR: 36.7 Relative Risk of hospitalized diarrhea among NOT BF infants as compared to EBF infants	14.6-92.4	-	N.A.		Fixed Effects MA used to combine RRs for overall 0-5 mos age category for a given study site: RR: 31.32 (15.03-65.29) This RR was used in the overall random effects MA in lieu of RRs for individual age groups	0-5 mos
Infant feeding and risk of severe diarrhea in Basrah city, Iraq: a case-control study	Mahmood	1989	Bulletin of the World Health Organization 1989; 67(6): 701-06	1983-1984	Iraq	Basrah City	Urban	-	Hospital/Health Center	No	NA	NA	NA	NA	NA	not stated	Case-Control	Not Quasi-experimental	Infant age, month of selection into study, years of school education of mother, place of residence, sex, ownership of car, ownership of house, type of house in which family lives and type of infant drinking water (boiled vs. unboiled)	Likely	NA			NA	NA	No	4-5 mos	All maternal & child health clinics in area visited once during each of six 5-week periods; Interviews with mothers to assess BF status; review of hospital records and use of diagnostic tests to assess admission for diarrhea	NOT BF vs. Predominantly BF	Diarrhea-specific hospitalization =# admissions to hospital where diarrhea is main cause for admission	not provided	not provided	not provided	not provided	RR: 23.8 Relative Risk of hospitalized diarrhea among NOT BF infants as compared to EBF infants	7.1-80.5	-	N.A.
Infant feeding and risk of severe diarrhea in Basrah city, Iraq: a case-control study	Mahmood	1989	Bulletin of the World Health Organization 1989; 67(6): 701-06	1983-1984	Iraq	Basrah City	Urban	-	Hospital/Health Center	No	NA	NA	NA	NA	NA	not stated	Case-Control	Not Quasi-experimental	Infant age, month of selection into study, years of school education of mother, place of residence, sex, ownership of car, ownership of house, type of house in which family lives and type of infant drinking water (boiled vs. unboiled)	Likely	NA			NA	NA	No	6-7 mos	All maternal & child health clinics in area visited once during each of six 5-week periods; Interviews with mothers to assess BF status; review of hospital records and use of diagnostic tests to assess admission for diarrhea	NOT BF vs. Partial BF	Diarrhea-specific hospitalization =# admissions to hospital where diarrhea is main cause for admission	not provided	not provided	not provided	not provided	RR 4.9 Relative Risk of hospitalized diarrhea among NOT BF infants as compared to Partial BF	1.6-14.9	-	N.A.		Fixed Effects MA used to combine RRs for overall 0-5 mos age category for a given study site: RR: 6.05 (2.44-14.97) This RR was used in the overall random effects MA in lieu of RRs for individual age groups	6-11 mos
Infant feeding and risk of severe diarrhea in Basrah city, Iraq: a case-control study	Mahmood	1989	Bulletin of the World Health Organization 1989; 67(6): 701-06	1983-1984	Iraq	Basrah City	Urban	-	Hospital/Health Center	No	NA	NA	NA	NA	NA	not stated	Case-Control	Not Quasi-experimental	Infant age, month of selection into study, years of school education of mother, place of residence, sex, ownership of car, ownership of house, type of house in which family lives and type of infant drinking water (boiled vs. unboiled)	Likely	NA			NA	NA	No	8-11 mos	All maternal & child health clinics in area visited once during each of six 5-week periods; Interviews with mothers to assess BF status; review of hospital records and use of diagnostic tests to assess admission for diarrhea	NOT BF vs. Partial BF	Diarrhea-specific hospitalization =# admissions to hospital where diarrhea is main cause for admission	not provided	not provided	not provided	not provided	RR: 9.1 Relative Risk of hospitalized diarrhea among NOT BF infants as compared to Partial BF	1.9-42.7	-	N.A.

## Sheet: Reverse Causality 
Study	Outcome(s)	Age Group(s)	Reverse causality? Scoring System: Not likely = 0 likely = 0.5-2 highly likely = 2.5-4	Excluded outcome(s) ocurring in first 7 days of life?	Excluded ill infants (for reasons other than diarrhea) or infants with poor growth?	Are exposure and outcome assessed concurrently?	Assessed whether infant was sick or growing poorly at time of weaning and/or whether weaning was a direct consequence of diarrhea?
Arifeen	Diarrhea Mortality; All-Cause Mortality	0-5 mos	Likely Score: 2	Yes	No (+1)	No -used feeding status from visit immediately preceding death (i.e.last visit where child was alive)	No (+1)
		6-11 mos	Likely Score: 2	N.A.
Bahl	Diarrhea Mortality; All-Cause Mortality	6-26 weeks	Likely Score: 2	N.A.	No (+1)	Yes - but addressed reverse causality by excluding deaths occurring within 7 days of assessment of BF exposure & results remained the same (+0)	No (+1)
	Diarrhea Hospitalizations		Highly Likely Score: 3	N.A.	No (+1)	Yes (+1)	No (+1)
Briend	Prevalence; All-Cause Mortality	12-23 mos	Highly Likely Score: 3	N.A.	No (+1)	Yes (+1)	No (+1)
Brown	Incidence; Prevalence	0-5 mos	Likely Score: 2	No (+1)	Yes	No - BF exposure assessed on date of child's birthday and diarrhea incidence assessed at followup visits throughout the mos	No (+1)
		6-11 mos	Likely Score: 1	N.A.
Clemens	Incidence	0-5 mos	Likely Score: 2	Yes	Yes	Yes (+1)	No (+1)
Edmond	All-Cause Mortality	2-28 days	Likely Score: 1	No - but excluded deaths occurring in first 2 days of life and verified that excluding deaths occurring in days 2-7 did not impact effect sizes (+0)	No - but verified that exclusion of infants at high risk of death (unwell on day of birth, congenital abnormalities, premature, and unwell at the time of interview) did not impact effect sizes (+0)	No - BF assessed at birth and mortality assessed at follow-up visits throughout neonatal period	No (+1)
Garrido	Diarrhea Mortality	0-11 mos	Highly Likely Score: 3	Yes	No (+1)	Yes (+1)	No (+1)
Ketsela	Incidence	0-5 mos	Highly Likely Score: 4	No (+1)	No (+1)	Yes (+1)	No (+1)
Lopez	Incidence; Prevalence	0-5 mos	Highly Likely Score: 3	No (+1)	Yes	Yes (+1)	No (+1)
		6-11 mos	Likely Score: 2	N.A.
Macias-Carrillo	Incidence	0-3 mos	Highly Likely Score: 3	No (+1)	Yes	Yes (+1)	No (+1)
Mahmood	Diarrhea Hospitalizations	2-5 mos; 6-11 mos	Likely Score: 1	N.A.	Yes	No - obtained BF exposure PRIOR to onset of illness requiring hospitalization	No (+1)
Mihrshahi	Prevalence	0-5 mos	Likely Score: 2	Yes	Yes	Yes (+1)	No (+1)
Molbak	Diarrhea Mortality	12-35 mos	Highly Likely Score: 3	N.A.	No (+1)	Yes (+1)	No (+1)
Mulder-Sibanda	Prevalence	6-11 mos; 12-23 mos	Likely Score: 2	N.A.	No (+1)	Yes (+1)	No (+1)
Popkin	Prevalence	0-5 mos	Highly Likely Score: 4	No (+1)	No (+1)	Yes (+1)	No (+1)
Vieira	Prevalence	0-5 mos; 0-11 mos	Highly Likely Score: 4	No (+1)	No (+1)	Yes (+1)	No (+1)
Victora	Diarrhea Mortality	0-11 mos	Not Likely Score: 0	Yes	Yes	No - obtained feeding mode immediately PRIOR to development of terminal illness	Yes - infants that weaned as a direct consequence of diarrhea were considered still BF in the analysis
Yoon	Diarrhea Mortality	6-11 mos; 12-23 mos	Likely Score: 2	N.A.	No (+1)	No - obtained feeding mode immediately PRIOR to development of terminal illness	No (+1)
